# Supplementary material for: Aberrantly Expressed lncRNAs in Primary Varicose Great Saphenous Veins
Source: PLoS One. 2014 Jan 31;9(1):e86156. doi: 10.1371/journal.pone.0086156 (PMC3908920; doi:10.1371/journal.pone.0086156)
Supplement: Table S3 — Biological Processes. (XLS) [file pone.0086156.s003.xls]

## Sheet: BP down
#Column "GO.ID" stands for the ID of gene ontology term
#Column "Term" stands for the name of gene ontology term
#Column "Ontology" stands for the ontology of GOID belongs to
#Column "Count" stands for the number of DE genes associated with the listed GOID
#Column "Pop.Hits" stands for the number of background population genes associated with the listed GOID
#Column "List.Total" stands for the total number of DE genes
#Column "Pop.Total" stands for the total number of background population genes
#Column "Fold.Enrichment" stands for the Fold Enrichment value of the GOID, it equals (Count/Pop.Hits)/(List.Total/Pop.Total)
#Column "Pvalue" stands for the significance testing value of the GOID
#Column "FDR" stands for the false discovery rate of the GOID, using Benjamini & Hochberg (1995) method
#Column "Enrichment.Score" stands for the Enrichment Score value of the GOID, it equals (-log10(Pvalue))
#Column "GENES" stands for the DE genes associated with the GOID
GO.ID	Term	Ontology	Count	Pop.Hits	List.Total	Pop.Total	Fold.Enrichment	Pvalue	FDR	Enrichment.Score	GENES
GO:0044237	cellular metabolic process	Biological process	363	7992	554	14586	1.19585	1.09128e-07	0.000247359	6.96206	PIGK//KPNA1//PIK3C3//RBM14//NFIB//PRIM2//RPA1//RRM1//PAPD5//BRCA1//SSRP1//TMX1//MCM8//CDKN2C//GTPBP4//RYBP//SUZ12//FOXD3//NFX1//NR2F2//ZNF148//NRIP1//PIAS1//NCBP2//PNRC2//DCP1A//UPF3B//CRK//UBE2D3//MYLIP//TRIP12//KIAA0317//C2ORF29//CNOT8//SLU7//HNRNPM//MBNL1//HNRNPR//CWC27//SKIV2L2//HNRNPD//HNRNPF//HNRNPH3//HNRNPU//POLR2I//CCAR1//TOP2B//XRCC5//XRN2//ALDH2//ALDH9A1//PTGDS//PUS7//RPUSD4//SLC25A17//…
GO:0006996	organelle organization	Biological process	103	1648	554	14586	1.64553	1.78637e-07	0.000247359	6.74803	PIK3C3//RPA1//ANAPC4//ANAPC5//TBCE//STAG1//STAG2//NSL1//KIF2A//NUP133//MIS12//SMC3//PRIM2//XRCC5//TOP2B//MAP1B//KAT5//MSL3//SHPRH//NEDD9//LIMA1//GSN//FMNL2//CRK//ARFIP2//CXCL1//NF1//PDPK1//ROCK2//MTSS1//ARHGAP10//MAN2A1//VAMP7//PEX19//HDAC2//SMARCA1//ACTL6A//TFAM//AP3B1//TRNT1//SYNE1//ATXN7//ZMPSTE24//PTCD2//DLG1//BLOC1S2//COL4A3BP//SEC23IP//GOLGA5//ABCD3//SCP2//RAB22A//VPS4B//PPT1//MAPRE2//WAPAL…
GO:0044238	primary metabolic process	Biological process	367	8137	554	14586	1.18749	2.02642e-07	0.000247359	6.69327	PIGK//KPNA1//RBM14//NFIB//PRIM2//RPA1//RRM1//PAPD5//BRCA1//SSRP1//TMX1//MCM8//CDKN2C//GTPBP4//RYBP//SUZ12//FOXD3//NFX1//NR2F2//ZNF148//NRIP1//PIAS1//NCBP2//PNRC2//DCP1A//UPF3B//CRK//UBE2D3//MYLIP//TRIP12//KIAA0317//C2ORF29//CNOT8//SLU7//HNRNPM//MBNL1//HNRNPR//CWC27//SKIV2L2//HNRNPD//HNRNPF//HNRNPH3//HNRNPU//POLR2I//CCAR1//TOP2B//XRCC5//XRN2//PTGDS//PUS7//RPUSD4//SLC25A17//EIF3A//FAM129A//DAB2//NP…
GO:0008152	metabolic process	Biological process	392	8964	554	14586	1.15136	1.91884e-06	0.0017567	5.71696	PIGK//KPNA1//PIK3C3//RBM14//NFIB//PRIM2//RPA1//RRM1//PAPD5//BRCA1//SSRP1//TMX1//MCM8//CDKN2C//GTPBP4//RYBP//SUZ12//FOXD3//NFX1//NR2F2//ZNF148//NRIP1//PIAS1//NCBP2//PNRC2//DCP1A//UPF3B//CRK//UBE2D3//MYLIP//TRIP12//KIAA0317//C2ORF29//CNOT8//SLU7//HNRNPM//MBNL1//HNRNPR//CWC27//SKIV2L2//HNRNPD//HNRNPF//HNRNPH3//HNRNPU//POLR2I//CCAR1//TOP2B//XRCC5//XRN2//ALDH2//ALDH9A1//PTGDS//PUS7//RPUSD4//SLC25A17//…
GO:0044260	cellular macromolecule metabolic process	Biological process	283	6072	554	14586	1.2271	2.99475e-06	0.00219335	5.52364	PIGK//KPNA1//RBM14//NFIB//PRIM2//RPA1//RRM1//PAPD5//BRCA1//SSRP1//TMX1//MCM8//CDKN2C//GTPBP4//RYBP//SUZ12//FOXD3//NFX1//NR2F2//ZNF148//NRIP1//PIAS1//NCBP2//PNRC2//DCP1A//UPF3B//CRK//UBE2D3//MYLIP//TRIP12//KIAA0317//C2ORF29//CNOT8//SLU7//HNRNPM//MBNL1//HNRNPR//CWC27//SKIV2L2//HNRNPD//HNRNPF//HNRNPH3//HNRNPU//POLR2I//CCAR1//TOP2B//XRCC5//XRN2//PUS7//RPUSD4//EIF3A//FAM129A//DAB2//NPTN//AXIN2//EIF4G3…
GO:0044248	cellular catabolic process	Biological process	82	1329	554	14586	1.62448	6.61349e-06	0.00403644	5.17957	PIK3C3//NCBP2//PNRC2//DCP1A//UPF3B//MYLIP//TRIP12//KIAA0317//C2ORF29//CNOT8//RPA1//XRN2//SLC25A17//PPT1//IDH1//PRKAG2//EIF2S3//GTPBP4//GNB2//ARL8B//RAB22A//RAB5A//RAP1B//SRP54//RAB7A//RHOBTB3//OLA1//VPS4B//TDG//KPNA1//HNRNPD//PNPT1//USP33//ARIH1//ANAPC4//USP50//ANAPC5//NUB1//UBE2D3//FBXO11//CUL2//CDC23//USP13//USP15//GOT2//GLUD2//QDPR//CCBL2//GALC//CTSB//LAMP1//HIBADH//ACAT1//PLA2G4A//ZMPSTE24//H…
GO:0009056	catabolic process	Biological process	94	1595	554	14586	1.55165	8.5389e-06	0.00446706	5.0686	PIK3C3//NCBP2//PNRC2//DCP1A//UPF3B//MYLIP//TRIP12//KIAA0317//C2ORF29//CNOT8//RPA1//XRN2//SLC25A17//PPT1//PGM1//PGM2//PYGB//LYVE1//GNS//PDHA1//HIBADH//RPIA//IDH1//PRKAG2//EIF2S3//GTPBP4//GNB2//ARL8B//RAB22A//RAB5A//RAP1B//SRP54//RAB7A//RHOBTB3//OLA1//VPS4B//TDG//KPNA1//HNRNPD//PNPT1//USP33//ARIH1//ANAPC4//USP50//ANAPC5//NUB1//UBE2D3//FBXO11//CUL2//CDC23//USP13//USP15//MGEA5//GOT2//GLUD2//QDPR//CCB…
GO:0006067	ethanol metabolic process	Biological process	5	11	554	14586	11.9675	2.96525e-05	0.010457	4.52794	ADH1A//ADH1B//ADH1C//ALDH1A1//ALDH2
GO:0006069	ethanol oxidation	Biological process	5	11	554	14586	11.9675	2.96525e-05	0.010457	4.52794	ADH1A//ADH1B//ADH1C//ALDH1A1//ALDH2
GO:0034308	primary alcohol metabolic process	Biological process	5	11	554	14586	11.9675	2.96525e-05	0.010457	4.52794	ADH1A//ADH1B//ADH1C//ALDH1A1//ALDH2
GO:0043170	macromolecule metabolic process	Biological process	300	6677	554	14586	1.18295	3.4186e-05	0.010457	4.46615	PIGK//KPNA1//RBM14//NFIB//PRIM2//RPA1//RRM1//PAPD5//BRCA1//SSRP1//TMX1//MCM8//CDKN2C//GTPBP4//RYBP//SUZ12//FOXD3//NFX1//NR2F2//ZNF148//NRIP1//PIAS1//NCBP2//PNRC2//DCP1A//UPF3B//CRK//UBE2D3//MYLIP//TRIP12//KIAA0317//C2ORF29//CNOT8//SLU7//HNRNPM//MBNL1//HNRNPR//CWC27//SKIV2L2//HNRNPD//HNRNPF//HNRNPH3//HNRNPU//POLR2I//CCAR1//TOP2B//XRCC5//XRN2//PUS7//RPUSD4//EIF3A//FAM129A//DAB2//NPTN//AXIN2//EIF4G3…
GO:0009057	macromolecule catabolic process	Biological process	46	649	554	14586	1.86612	3.42664e-05	0.010457	4.46513	NCBP2//PNRC2//DCP1A//UPF3B//MYLIP//TRIP12//KIAA0317//C2ORF29//CNOT8//RPA1//XRN2//PPT1//PGM1//PGM2//PYGB//LYVE1//GNS//TDG//KPNA1//HNRNPD//PNPT1//USP33//ARIH1//ANAPC4//USP50//ANAPC5//NUB1//UBE2D3//FBXO11//CUL2//CDC23//USP13//USP15//MGEA5//AFG3L2//ZMPSTE24//HSP90B1//RNF103//PSMD5//HSP90AB1//DAB2//GCLC//TBL1X//EGLN2//SH3D19//PAPD5
GO:0006396	RNA processing	Biological process	44	617	554	14586	1.87756	4.40698e-05	0.0124141	4.35586	C2ORF29//CNOT8//SLU7//HNRNPM//MBNL1//NCBP2//HNRNPR//CWC27//SKIV2L2//HNRNPD//HNRNPF//HNRNPH3//HNRNPU//POLR2I//CCAR1//UPF3B//C1D//KRR1//RNASE4//MBNL2//KHDRBS1//XRN2//NONO//PRPF39//RBM28//CPEB1//SPOP//CIR1//THOC1//RPP14//KARS//TYW1B//TRMT6//PUS7//PUS3//RBM3//INTS3//TRNT1//PTCD2//RCL1//LARP6//MRPL1//RTCD1//PNPT1
GO:0007059	chromosome segregation	Biological process	14	114	554	14586	3.23333	0.00010483	0.0268678	3.97952	TOP2B//STAG2//SMC3//CDC23//WAPAL//CTCF//AXIN2//STAG1//NSL1//ARL8B//BRCA1//MIS12//SETDB2//RIOK3
GO:0046907	intracellular transport	Biological process	52	802	554	14586	1.70709	0.000110054	0.0268678	3.9584	NUP205//CEP57//GOLGA5//PEX19//NCBP2//NUP133//UPF3B//THOC1//KPNA1//IPO5//HSPA9//SEC63//ICMT//EXOC4//SRP54//AP3B1//TRNT1//PRKAG2//SLC25A20//AP3S2//SEC23IP//CSE1L//STX2//RAB3GAP2//GGA1//ARFGAP3//MYO6//SYTL2//BCAP29//SNX6//COG3//USO1//COPB2//SEC24D//VAMP7//TMX1//SCFD1//EXOC5//SH3D19//TXNDC5//SCAMP1//PUM1//VPS26A//KIF13A//RAB7A//VPS4B//AXIN2//RHOBTB3//VPS35//NF1//C16ORF70//KHDRBS1
GO:0006807	nitrogen compound metabolic process	Biological process	241	5248	554	14586	1.20907	0.000119381	0.0273233	3.92306	KPNA1//RBM14//NFIB//PRIM2//RPA1//RRM1//PAPD5//BRCA1//SSRP1//TMX1//MCM8//RYBP//SUZ12//FOXD3//NFX1//NR2F2//ZNF148//NRIP1//PIAS1//NCBP2//PNRC2//DCP1A//UPF3B//C2ORF29//CNOT8//SLU7//HNRNPM//MBNL1//HNRNPR//CWC27//SKIV2L2//HNRNPD//HNRNPF//HNRNPH3//HNRNPU//POLR2I//CCAR1//TOP2B//XRCC5//XRN2//PUS7//RPUSD4//UGP2//LYVE1//GNS//HIBADH//RPIA//GPX3//IDH1//QDPR//DCK//NME7//EIF2S3//GTPBP4//GNB2//ARL8B//RAB22A//RAB…
GO:0033036	macromolecule localization	Biological process	79	1388	554	14586	1.49853	0.000158525	0.0317856	3.7999	NUP205//CEP57//ICMT//VPS13C//AKAP7//PEX19//NCBP2//NUP133//UPF3B//THOC1//KPNA1//IPO5//HSPA9//SEC63//EXOC4//SRP54//AP3B1//TRNT1//PRKAG2//SLC25A20//COL4A3BP//OSBPL9//OSBP//SCP2//AP3S2//SEC23IP//CSE1L//STX2//RAB3GAP2//GGA1//ARFGAP3//MYO6//SYTL2//BCAP29//SNX6//COG3//USO1//COPB2//SEC24D//EXOC5//TMED2//SLC15A4//CHCHD4//SCFD1//TNPO3//GDI2//VPS24//VPS53//UEVLD//CCDC91//PPT1//VPS35//EXOC1//RAB22A//RAB5A//K…
GO:0009987	cellular process	Biological process	499	12380	554	14586	1.06122	0.000167648	0.0317856	3.7756	RCL1//GTPBP4//AATF//PIGK//KPNA1//PIK3C3//NUP205//CEP57//RBM14//NFIB//PRIM2//RPA1//RRM1//PAPD5//BRCA1//SSRP1//TMX1//MCM8//STAG1//CTCF//NSL1//ARL8B//MIS12//SETDB2//RIOK3//ANAPC4//ANAPC5//PSMD5//RFWD2//CDC23//CCNG2//CDKN2C//PPP6C//CUL2//KHDRBS1//PRKAR2B//TAF2//STAG2//KIF2A//NUP133//SMC3//RYBP//SUZ12//FOXD3//NFX1//NR2F2//ZNF148//NRIP1//PIAS1//NF1//BRAP//NCBP2//PNRC2//DCP1A//UPF3B//CRK//UBE2D3//MYLIP/…
GO:0006139	nucleobase, nucleoside, nucleotide and nucleic acid metabolic process	Biological process	220	4745	554	14586	1.22071	0.000172269	0.0317856	3.76379	KPNA1//RBM14//NFIB//PRIM2//RPA1//RRM1//PAPD5//BRCA1//SSRP1//TMX1//MCM8//RYBP//SUZ12//FOXD3//NFX1//NR2F2//ZNF148//NRIP1//PIAS1//NCBP2//PNRC2//DCP1A//UPF3B//C2ORF29//CNOT8//SLU7//HNRNPM//MBNL1//HNRNPR//CWC27//SKIV2L2//HNRNPD//HNRNPF//HNRNPH3//HNRNPU//POLR2I//CCAR1//TOP2B//XRCC5//XRN2//PUS7//RPUSD4//UGP2//HIBADH//RPIA//DCK//NME7//EIF2S3//GTPBP4//GNB2//ARL8B//RAB22A//RAB5A//RAP1B//SRP54//RAB7A//RHOBT…
GO:0034641	cellular nitrogen compound metabolic process	Biological process	236	5149	554	14586	1.20675	0.000173597	0.0317856	3.76046	KPNA1//RBM14//NFIB//PRIM2//RPA1//RRM1//PAPD5//BRCA1//SSRP1//TMX1//MCM8//RYBP//SUZ12//FOXD3//NFX1//NR2F2//ZNF148//NRIP1//PIAS1//NCBP2//PNRC2//DCP1A//UPF3B//C2ORF29//CNOT8//SLU7//HNRNPM//MBNL1//HNRNPR//CWC27//SKIV2L2//HNRNPD//HNRNPF//HNRNPH3//HNRNPU//POLR2I//CCAR1//TOP2B//XRCC5//XRN2//PUS7//RPUSD4//UGP2//HIBADH//RPIA//GPX3//IDH1//DCK//NME7//EIF2S3//GTPBP4//GNB2//ARL8B//RAB22A//RAB5A//RAP1B//SRP54//…
GO:0048193	Golgi vesicle transport	Biological process	15	137	554	14586	2.88268	0.000221082	0.0385524	3.65545	GOLGA5//VAMP7//TMX1//COG3//SEC24D//SCFD1//COPB2//EXOC5//SH3D19//TXNDC5//SCAMP1//PUM1//EXOC4//C16ORF70//USO1
GO:0044265	cellular macromolecule catabolic process	Biological process	37	527	554	14586	1.84849	0.000243111	0.0404669	3.6142	NCBP2//PNRC2//DCP1A//UPF3B//MYLIP//TRIP12//KIAA0317//C2ORF29//CNOT8//RPA1//XRN2//PPT1//TDG//KPNA1//HNRNPD//PNPT1//USP33//ARIH1//ANAPC4//USP50//ANAPC5//NUB1//UBE2D3//FBXO11//CUL2//CDC23//USP13//USP15//ZMPSTE24//HSP90B1//RNF103//PSMD5//HSP90AB1//DAB2//GCLC//TBL1X//PAPD5
GO:0006259	DNA metabolic process	Biological process	42	638	554	14586	1.73323	0.000371284	0.0578048	3.43029	KPNA1//RBM14//NFIB//PRIM2//RPA1//RRM1//PAPD5//BRCA1//SSRP1//TMX1//MCM8//TOP2B//XRCC5//XRN2//TFAM//ESCO1//SMC3//PARP2//CRY1//SHPRH//EPC2//NONO//POLR2I//INTS3//TCEA1//TDG//UBE2D3//CDC14B//MORF4L2//KAT5//BRCC3//NHEJ1//PPT1//TSN//WAPAL//GTPBP4//CTCF//SWAP70//AXIN2//STAG2//PARG//IL27RA
GO:0070647	protein modification by small protein conjugation or removal	Biological process	31	424	554	14586	1.92496	0.000386839	0.0578048	3.41247	UBE2D3//MYLIP//TRIP12//KIAA0317//FBXL2//ANAPC4//ANAPC5//NUB1//CAND1//RFWD2//BRCA1//RNF103//FBXO11//BRAP//CDC23//RNF14//CDC73//CTR9//SUZ12//ATXN7//USP33//USP15//KIAA0776//GTPBP4//GCLC//PIAS1//PSMD5//CDC14B//RNF13//BRCC3//UBA5
GO:0071841	cellular component organization or biogenesis at cellular level	Biological process	135	2722	554	14586	1.30579	0.000394626	0.0578048	3.40381	RCL1//GTPBP4//AATF//PIK3C3//NUP205//RPA1//ANAPC4//ANAPC5//TBCE//STAG1//STAG2//NSL1//KIF2A//NUP133//MIS12//SMC3//NCBP2//SLU7//PRIM2//XRCC5//TOP2B//MAP1B//EIF3A//KAT5//MSL3//SHPRH//NEDD9//LIMA1//GSN//FMNL2//CRK//ARFIP2//CXCL1//NF1//PDPK1//ROCK2//MTSS1//ARHGAP10//MAN2A1//VAMP7//PEX19//KPNA1//PPT1//HDAC2//SMARCA1//ACTL6A//C1D//KRR1//MBNL1//TFAM//SRP54//AP3B1//TRNT1//HPS3//SYNE1//ATXN7//ZMPSTE24//PTCD…
GO:0044267	cellular protein metabolic process	Biological process	138	2810	554	14586	1.293	0.000510285	0.0713482	3.29219	PIGK//CDKN2C//GTPBP4//CRK//UBE2D3//MYLIP//TRIP12//KIAA0317//EIF3A//FAM129A//DAB2//NPTN//AXIN2//EIF4G3//PPT1//CWC27//DNAJA2//SEC63//FKBP8//HSPA9//HSP90AB1//TBCE//HSP90B1//DNAJC7//PPIL4//C19ORF2//ERRFI1//SNX6//FBXL2//ANAPC4//ANAPC5//NUB1//CAND1//RFWD2//BRCA1//RNF103//FBXO11//BRAP//CDC23//RNF14//HBS1L//EIF2S3//HARS2//RPL7L1//HARS//MRPL1//TARS//RBM3//CPEB1//PPP1R15B//PUM1//KARS//IARS2//NCBP2//TRMT6//…
GO:0051301	cell division	Biological process	28	375	554	14586	1.96586	0.000526052	0.0713482	3.27897	STX2//SEPT6//ROCK2//SEPT7//AATF//FGF7//STAG1//STAG2//MAPRE2//SEPT10//WAPAL//NSL1//ANAPC4//KIF2A//SEPT2//NEDD9//ANAPC5//VPS24//ARL8B//SEPT11//PAPD5//MIS12//MAP9//SETDB2//CDC23//CCNG2//SMC3//VPS4B
GO:0015031	protein transport	Biological process	56	943	554	14586	1.56352	0.000564094	0.0718146	3.24865	NUP205//CEP57//PEX19//KPNA1//IPO5//HSPA9//SEC63//ICMT//EXOC4//SRP54//AP3B1//TRNT1//AP3S2//SEC23IP//CSE1L//STX2//RAB3GAP2//GGA1//ARFGAP3//MYO6//SYTL2//BCAP29//SNX6//COG3//USO1//COPB2//SEC24D//ATP6V1B2//AXIN2//NF1//C16ORF70//PIK3C3//EXOC5//TMED2//SLC15A4//CHCHD4//SCFD1//TNPO3//GDI2//VPS24//VPS53//UEVLD//CCDC91//PPT1//VPS35//NUP133//EXOC1//RAB22A//RAB5A//KIF13A//VAMP7//HSP90B1//RAB7A//SCAMP1//VPS4B/…
GO:0055114	oxidation-reduction process	Biological process	54	901	554	14586	1.57796	0.000571323	0.0718146	3.24312	SLC25A17//PRKAG2//PGM1//PGM2//UGP2//PYGB//ADH1A//ADH1B//ADH1C//ALDH1A1//ALDH2//HIBADH//RPIA//IDH1//GNB2//KCNB1//PRKAR2A//PRKAR2B//RAP1B//NDUFS1//UQCRC1//TMX1//CROT//SCP2//FASTKD2//ACSL1//SLC25A20//EGLN2//CRYZ//DIO3//ALDH1A3//ALDH9A1//KDM1A//FXN//GLUD2//SUMF1//GPX3//MAOB//ME1//TYW1B//ASPH//PAM//CYB5R4//CYP39A1//PDHA1//YPEL5//KDM3B//UEVLD//QDPR//RRM1//MOSC1//UTY//HSDL1//DHRS3
GO:0045184	establishment of protein localization	Biological process	57	966	554	14586	1.55355	0.000588323	0.0718146	3.23038	NUP205//CEP57//PEX19//KPNA1//IPO5//HSPA9//SEC63//ICMT//EXOC4//SRP54//AP3B1//TRNT1//AP3S2//SEC23IP//CSE1L//STX2//RAB3GAP2//GGA1//ARFGAP3//MYO6//SYTL2//BCAP29//SNX6//COG3//USO1//COPB2//SEC24D//EXOC5//TMED2//SLC15A4//CHCHD4//SCFD1//TNPO3//GDI2//VPS24//VPS53//UEVLD//CCDC91//PPT1//VPS35//NUP133//EXOC1//RAB22A//RAB5A//KIF13A//VAMP7//HSP90B1//RAB7A//SCAMP1//VPS4B//VPS26A//ATP6V1B2//AXIN2//NF1//C16ORF70/…
GO:0006397	mRNA processing	Biological process	28	379	554	14586	1.94511	0.000621395	0.0734048	3.20663	C2ORF29//CNOT8//SLU7//HNRNPM//MBNL1//NCBP2//HNRNPR//CWC27//SKIV2L2//HNRNPD//HNRNPF//HNRNPH3//HNRNPU//POLR2I//CCAR1//UPF3B//RNASE4//PTCD2//MBNL2//KHDRBS1//XRN2//NONO//PRPF39//RBM28//CPEB1//SPOP//CIR1//THOC1
GO:0008104	protein localization	Biological process	65	1146	554	14586	1.49333	0.000695024	0.0795368	3.158	NUP205//CEP57//PEX19//KPNA1//IPO5//HSPA9//SEC63//ICMT//EXOC4//SRP54//AP3B1//TRNT1//AP3S2//SEC23IP//CSE1L//STX2//RAB3GAP2//GGA1//ARFGAP3//MYO6//SYTL2//BCAP29//SNX6//COG3//USO1//COPB2//SEC24D//EXOC5//TMED2//SLC15A4//CHCHD4//SCFD1//TNPO3//GDI2//VPS24//VPS53//UEVLD//CCDC91//PPT1//VPS35//NUP133//EXOC1//RAB22A//RAB5A//KIF13A//VAMP7//HSP90B1//RAB7A//SCAMP1//VPS4B//VPS26A//SEPT2//ATP6V1B2//FGF7//PTPRK//C…
GO:0016568	chromatin modification	Biological process	27	366	554	14586	1.94227	0.000789725	0.0876355	3.10252	HDAC2//SMARCA1//ACTL6A//CDC73//CTR9//RTF1//SUZ12//KAT5//RBM14//ATXN7//KDM1A//WDR92//SUV420H1//MSL3//SETDB2//BRCC3//CTCF//AEBP2//DAPK3//ARID2//EPC2//UBN1//KDM3B//MBTD1//BANP//UTY//MORF4L2
GO:0071842	cellular component organization at cellular level	Biological process	129	2632	554	14586	1.29042	0.000895203	0.0964187	3.04808	PIK3C3//NUP205//RPA1//ANAPC4//ANAPC5//TBCE//STAG1//STAG2//NSL1//KIF2A//NUP133//MIS12//SMC3//NCBP2//SLU7//PRIM2//XRCC5//TOP2B//MAP1B//EIF3A//KAT5//MSL3//SHPRH//NEDD9//LIMA1//GSN//FMNL2//CRK//ARFIP2//CXCL1//NF1//PDPK1//ROCK2//MTSS1//ARHGAP10//MAN2A1//VAMP7//PEX19//KPNA1//PPT1//HDAC2//SMARCA1//ACTL6A//MBNL1//TFAM//SRP54//AP3B1//TRNT1//HPS3//SYNE1//ATXN7//ZMPSTE24//PTCD2//DLG1//BLOC1S2//COL4A3BP//SEC…
GO:0090304	nucleic acid metabolic process	Biological process	185	4007	554	14586	1.21557	0.00102675	0.105644	2.98853	KPNA1//RBM14//NFIB//PRIM2//RPA1//RRM1//PAPD5//BRCA1//SSRP1//TMX1//MCM8//RYBP//SUZ12//FOXD3//NFX1//NR2F2//ZNF148//NRIP1//PIAS1//NCBP2//PNRC2//DCP1A//UPF3B//C2ORF29//CNOT8//SLU7//HNRNPM//MBNL1//HNRNPR//CWC27//SKIV2L2//HNRNPD//HNRNPF//HNRNPH3//HNRNPU//POLR2I//CCAR1//TOP2B//XRCC5//XRN2//PUS7//RPUSD4//TFAM//ESCO1//SMC3//PARP2//CRY1//SHPRH//EPC2//NONO//INTS3//TCEA1//TDG//UBE2D3//CDC14B//MORF4L2//KAT5//…
GO:0016192	vesicle-mediated transport	Biological process	46	755	554	14586	1.60412	0.00104376	0.105644	2.9814	GOLGA5//WDR1//VAMP7//EXOC5//SYTL2//EXOC1//TMX1//COG3//SEC24D//SCFD1//COPB2//SH3D19//TXNDC5//SCAMP1//PUM1//EXOC4//USP33//MYO6//RAB22A//RAB5A//RAB7A//AP3B1//PPT1//DAB2//ELMOD2//STX2//KIF13A//VPS4B//LGI3//USO1//ANXA2//PLA2G4A//RHOBTB3//VPS35//SNX6//VPS26A//C16ORF70//AP3S2//RTN3//TMED2//GGA1//ARFGAP3//STXBP6//ERGIC2//BCAP29//MUTED
GO:0016071	mRNA metabolic process	Biological process	34	510	554	14586	1.75523	0.0010674	0.105644	2.97167	NCBP2//PNRC2//DCP1A//UPF3B//C2ORF29//CNOT8//SLU7//HNRNPM//MBNL1//HNRNPR//CWC27//SKIV2L2//HNRNPD//HNRNPF//HNRNPH3//HNRNPU//POLR2I//CCAR1//RNASE4//MBNL2//KHDRBS1//XRN2//NONO//PRPF39//RBM28//CPEB1//SPOP//CIR1//THOC1//PNPT1//AXIN2//PTCD2//PAPD5//PSMD5
GO:0032446	protein modification by small protein conjugation	Biological process	27	375	554	14586	1.89565	0.0011339	0.109273	2.94542	UBE2D3//MYLIP//TRIP12//KIAA0317//FBXL2//ANAPC4//ANAPC5//NUB1//CAND1//RFWD2//BRCA1//RNF103//FBXO11//BRAP//CDC23//RNF14//CDC73//CTR9//SUZ12//KIAA0776//GTPBP4//GCLC//PIAS1//PSMD5//CDC14B//RNF13//UBA5
GO:0016050	vesicle organization	Biological process	9	71	554	14586	3.33742	0.00140839	0.130455	2.85128	VAMP7//ANXA2//PLA2G4A//BLOC1S2//KIF13A//AP3B1//COPB2//SEC24D//USO1
GO:0043412	macromolecule modification	Biological process	109	2189	554	14586	1.31101	0.00144687	0.130455	2.83957	PIGK//CDKN2C//GTPBP4//CRK//UBE2D3//MYLIP//TRIP12//KIAA0317//PUS7//RPUSD4//FAM129A//DAB2//NPTN//AXIN2//EIF4G3//PPT1//ERRFI1//SNX6//FBXL2//ANAPC4//ANAPC5//NUB1//CAND1//RFWD2//BRCA1//RNF103//FBXO11//BRAP//CDC23//RNF14//ICMT//PAM//UEVLD//RPN1//COL4A3BP//CHUK//NEK7//DAPK3//GRK5//JAK1//PIK3C3//PIK3CA//PKN2//PTK6//MAP4K3//RIOK3//ROCK2//GOLGA5//NF1//PRKAG2//PDPK1//DBNDD2//PPP2R2A//PPP6C//PTPN12//PTPRK//P…
GO:0071840	cellular component organization or biogenesis	Biological process	161	3442	554	14586	1.23152	0.00146058	0.130455	2.83547	RCL1//GTPBP4//AATF//PIK3C3//NUP205//RPA1//ANAPC4//ANAPC5//TBCE//STAG1//STAG2//NSL1//KIF2A//NUP133//MIS12//SMC3//NCBP2//SLU7//PRIM2//XRCC5//TOP2B//COL4A3BP//DAB2//EMP1//FHL1//XRN2//EGLN2//IGFBP6//MORF4L2//MAP1B//EIF3A//KAT5//MSL3//SHPRH//NEDD9//LIMA1//GSN//FMNL2//CRK//ARFIP2//CXCL1//NF1//PDPK1//ROCK2//MTSS1//ARHGAP10//MAN2A1//VAMP7//PEX19//KPNA1//PPT1//HDAC2//SMARCA1//ACTL6A//C1D//KRR1//MBNL1//TFA…
GO:0019752	carboxylic acid metabolic process	Biological process	45	749	554	14586	1.58182	0.00156025	0.132875	2.80681	PTGDS//SLC25A17//ALDH1A3//UGP2//PDHA1//PDK4//BSG//IDH1//GOT2//ME1//GPX3//HARS2//HARS//KARS//IARS2//TARS//GLUD2//SCLY//CCBL2//QDPR//PSMD5//GCLC//MAT2B//MAT2A//HIBADH//SLC27A4//ACSL1//PNPLA8//CROT//PRKAR2B//PTPLAD1//PLA2G4A//CYP39A1//SCP2//ACAT1//BHMT2//PANK1//AS3MT//PRKAG2//TASP1//ELOVL5//ALDH9A1//BRCA1//SLC25A20//ICMT
GO:0043436	oxoacid metabolic process	Biological process	45	749	554	14586	1.58182	0.00156025	0.132875	2.80681	PTGDS//SLC25A17//ALDH1A3//UGP2//PDHA1//PDK4//BSG//IDH1//GOT2//ME1//GPX3//HARS2//HARS//KARS//IARS2//TARS//GLUD2//SCLY//CCBL2//QDPR//PSMD5//GCLC//MAT2B//MAT2A//HIBADH//SLC27A4//ACSL1//PNPLA8//CROT//PRKAR2B//PTPLAD1//PLA2G4A//CYP39A1//SCP2//ACAT1//BHMT2//PANK1//AS3MT//PRKAG2//TASP1//ELOVL5//ALDH9A1//BRCA1//SLC25A20//ICMT
GO:0006892	post-Golgi vesicle-mediated transport	Biological process	8	59	554	14586	3.56997	0.00165637	0.137856	2.78084	C16ORF70//EXOC5//SH3D19//SCFD1//VAMP7//TXNDC5//SCAMP1//PUM1
GO:0007062	sister chromatid cohesion	Biological process	5	24	554	14586	5.48511	0.00181073	0.147353	2.74215	WAPAL//CTCF//AXIN2//STAG2//SMC3
GO:0051276	chromosome organization	Biological process	38	610	554	14586	1.64014	0.00190676	0.151795	2.7197	PRIM2//RPA1//XRCC5//TOP2B//KAT5//MSL3//SHPRH//HDAC2//SMARCA1//ACTL6A//STAG2//SMC3//CDC23//CDC73//CTR9//CTCF//AEBP2//DAPK3//ARID2//KDM1A//SUZ12//EPC2//UBN1//SUV420H1//KDM3B//MBTD1//BANP//UTY//BRCC3//SETDB2//MORF4L2//RTF1//RBM14//ATXN7//WDR92//AXIN2//WAPAL//MIS12
GO:0016567	protein ubiquitination	Biological process	25	353	554	14586	1.86463	0.00213248	0.166152	2.67112	UBE2D3//MYLIP//TRIP12//KIAA0317//CDC73//CTR9//SUZ12//KIAA0776//GTPBP4//GCLC//BRCA1//ANAPC4//ANAPC5//PSMD5//CDC23//CDC14B//RNF13//FBXL2//NUB1//CAND1//RFWD2//RNF103//FBXO11//BRAP//RNF14
GO:0006805	xenobiotic metabolic process	Biological process	13	138	554	14586	2.48022	0.00229506	0.17152	2.63921	AS3MT//CRYZ//ADH1A//ADH1B//ADH1C//ALDH1A1//ALDH2//GCLC//MAT2B//MAOB//MAT2A//CYP39A1//UGP2
GO:0071466	cellular response to xenobiotic stimulus	Biological process	13	138	554	14586	2.48022	0.00229506	0.17152	2.63921	ADH1A//ADH1B//ADH1C//ALDH1A1//ALDH2//GCLC//MAT2B//MAOB//MAT2A//CYP39A1//UGP2//AS3MT//CRYZ
GO:0006082	organic acid metabolic process	Biological process	45	766	554	14586	1.54671	0.00241023	0.173903	2.61794	PTGDS//SLC25A17//ALDH1A3//UGP2//PDHA1//PDK4//BSG//IDH1//GOT2//ME1//GPX3//HARS2//HARS//KARS//IARS2//TARS//GLUD2//SCLY//CCBL2//QDPR//PSMD5//GCLC//MAT2B//MAT2A//HIBADH//SLC27A4//ACSL1//PNPLA8//CROT//PRKAR2B//PTPLAD1//PLA2G4A//CYP39A1//SCP2//ACAT1//BHMT2//PANK1//AS3MT//PRKAG2//TASP1//ELOVL5//ALDH9A1//BRCA1//SLC25A20//ICMT
GO:0009410	response to xenobiotic stimulus	Biological process	13	139	554	14586	2.46238	0.00244657	0.173903	2.61144	ADH1A//ADH1B//ADH1C//ALDH1A1//ALDH2//GCLC//MAT2B//MAOB//MAT2A//CYP39A1//UGP2//AS3MT//CRYZ
GO:0016043	cellular component organization	Biological process	155	3336	554	14586	1.2233	0.00247156	0.173903	2.60703	PIK3C3//NUP205//RPA1//ANAPC4//ANAPC5//TBCE//STAG1//STAG2//NSL1//KIF2A//NUP133//MIS12//SMC3//NCBP2//SLU7//PRIM2//XRCC5//TOP2B//COL4A3BP//DAB2//EMP1//FHL1//XRN2//EGLN2//IGFBP6//MORF4L2//MAP1B//EIF3A//KAT5//MSL3//SHPRH//NEDD9//LIMA1//GSN//FMNL2//CRK//ARFIP2//CXCL1//NF1//PDPK1//ROCK2//MTSS1//ARHGAP10//MAN2A1//VAMP7//PEX19//KPNA1//PPT1//HDAC2//SMARCA1//ACTL6A//MBNL1//TFAM//ZNF148//WASL//SRP54//AP3B1//…
GO:0006464	protein modification process	Biological process	104	2107	554	14586	1.29956	0.0025169	0.173903	2.59913	PIGK//CDKN2C//GTPBP4//CRK//UBE2D3//MYLIP//TRIP12//KIAA0317//FAM129A//DAB2//NPTN//AXIN2//EIF4G3//PPT1//ERRFI1//SNX6//FBXL2//ANAPC4//ANAPC5//NUB1//CAND1//RFWD2//BRCA1//RNF103//FBXO11//BRAP//CDC23//RNF14//COL4A3BP//CHUK//NEK7//DAPK3//GRK5//JAK1//PIK3C3//PIK3CA//PKN2//PTK6//MAP4K3//RIOK3//ROCK2//GOLGA5//NF1//PRKAG2//PDPK1//DBNDD2//PPP2R2A//PPP6C//PTPN12//PTPRK//PTPRN//PTPRZ1//CDC14B//MTMR6//PARP2//IC…
GO:0042180	cellular ketone metabolic process	Biological process	45	770	554	14586	1.53868	0.00266075	0.178479	2.575	PTGDS//SLC25A17//ALDH1A3//UGP2//PDHA1//PDK4//BSG//IDH1//GOT2//ME1//GPX3//HARS2//HARS//KARS//IARS2//TARS//GLUD2//SCLY//CCBL2//QDPR//PSMD5//GCLC//MAT2B//MAT2A//HIBADH//SLC27A4//ACSL1//PNPLA8//CROT//PRKAR2B//PTPLAD1//PLA2G4A//CYP39A1//SCP2//ACAT1//BHMT2//PANK1//AS3MT//PRKAG2//TASP1//ELOVL5//ALDH9A1//BRCA1//SLC25A20//ICMT
GO:0006886	intracellular protein transport	Biological process	30	458	554	14586	1.72458	0.0026806	0.178479	2.57177	NUP205//CEP57//PEX19//KPNA1//IPO5//HSPA9//SEC63//ICMT//EXOC4//SRP54//AP3B1//TRNT1//AXIN2//NF1//C16ORF70//AP3S2//SEC23IP//CSE1L//STX2//RAB3GAP2//GGA1//ARFGAP3//MYO6//SYTL2//BCAP29//SNX6//COG3//USO1//COPB2//SEC24D
GO:0031576	G2/M transition checkpoint	Biological process	5	27	554	14586	4.87565	0.00313117	0.204756	2.50429	BRCA1//BRCC3//CDC14B//TOP2B//INTS3
GO:0019538	protein metabolic process	Biological process	153	3317	554	14586	1.21443	0.00358002	0.230001	2.44611	PIGK//CDKN2C//GTPBP4//CRK//UBE2D3//MYLIP//TRIP12//KIAA0317//EIF3A//FAM129A//DAB2//NPTN//AXIN2//EIF4G3//PPT1//CWC27//DNAJA2//SEC63//FKBP8//HSPA9//HSP90AB1//TBCE//HSP90B1//DNAJC7//PPIL4//C19ORF2//C1S//C7//ERRFI1//SNX6//FBXL2//ANAPC4//ANAPC5//NUB1//CAND1//RFWD2//BRCA1//RNF103//FBXO11//BRAP//CDC23//RNF14//HBS1L//EIF2S3//HARS2//RPL7L1//HARS//MRPL1//TARS//RBM3//CPEB1//PPP1R15B//PUM1//KARS//IARS2//NCBP2…
GO:0034613	cellular protein localization	Biological process	35	571	554	14586	1.61383	0.00367682	0.232147	2.43453	NUP205//CEP57//PEX19//KPNA1//IPO5//HSPA9//SEC63//ICMT//EXOC4//SRP54//AP3B1//TRNT1//AP3S2//SEC23IP//CSE1L//STX2//RAB3GAP2//GGA1//ARFGAP3//MYO6//SYTL2//BCAP29//SNX6//COG3//USO1//COPB2//SEC24D//FGF7//PTPRK//AXIN2//NF1//C16ORF70//WAPAL//PDPK1//SYNE1
GO:0070727	cellular macromolecule localization	Biological process	35	573	554	14586	1.6082	0.00388552	0.241165	2.41055	NUP205//CEP57//PEX19//KPNA1//IPO5//HSPA9//SEC63//ICMT//EXOC4//SRP54//AP3B1//TRNT1//AP3S2//SEC23IP//CSE1L//STX2//RAB3GAP2//GGA1//ARFGAP3//MYO6//SYTL2//BCAP29//SNX6//COG3//USO1//COPB2//SEC24D//FGF7//PTPRK//AXIN2//NF1//C16ORF70//WAPAL//PDPK1//SYNE1
GO:0006906	vesicle fusion	Biological process	4	18	554	14586	5.85078	0.00411871	0.251379	2.38524	ANXA2//PLA2G4A//USO1//VAMP7
GO:0044257	cellular protein catabolic process	Biological process	24	356	554	14586	1.77496	0.00483006	0.289962	2.31605	MYLIP//TRIP12//KIAA0317//USP33//ARIH1//ANAPC4//USP50//ANAPC5//NUB1//UBE2D3//FBXO11//CUL2//CDC23//USP13//USP15//ZMPSTE24//HSP90B1//RNF103//PSMD5//HSP90AB1//DAB2//GCLC//TBL1X//PPT1
GO:0060330	regulation of response to interferon-gamma	Biological process	4	19	554	14586	5.54285	0.00506248	0.294267	2.29564	HSP90AB1//IFNGR1//JAK1//PIAS1
GO:0060334	regulation of interferon-gamma-mediated signaling pathway	Biological process	4	19	554	14586	5.54285	0.00506248	0.294267	2.29564	HSP90AB1//IFNGR1//JAK1//PIAS1
GO:0030163	protein catabolic process	Biological process	27	418	554	14586	1.70065	0.00515228	0.294807	2.288	MYLIP//TRIP12//KIAA0317//USP33//ARIH1//ANAPC4//USP50//ANAPC5//NUB1//UBE2D3//FBXO11//CUL2//CDC23//USP13//USP15//ZMPSTE24//HSP90B1//RNF103//PSMD5//HSP90AB1//DAB2//GCLC//TBL1X//PPT1//EGLN2//SH3D19//AFG3L2
GO:0019941	modification-dependent protein catabolic process	Biological process	23	340	554	14586	1.78105	0.00550259	0.30531	2.25943	MYLIP//TRIP12//KIAA0317//USP33//ARIH1//ANAPC4//USP50//ANAPC5//NUB1//UBE2D3//FBXO11//CUL2//CDC23//USP13//USP15//ZMPSTE24//HSP90B1//RNF103//PSMD5//HSP90AB1//DAB2//GCLC//TBL1X
GO:0043632	modification-dependent macromolecule catabolic process	Biological process	23	340	554	14586	1.78105	0.00550259	0.30531	2.25943	MYLIP//TRIP12//KIAA0317//USP33//ARIH1//ANAPC4//USP50//ANAPC5//NUB1//UBE2D3//FBXO11//CUL2//CDC23//USP13//USP15//ZMPSTE24//HSP90B1//RNF103//PSMD5//HSP90AB1//DAB2//GCLC//TBL1X
GO:0006281	DNA repair	Biological process	23	341	554	14586	1.77582	0.00569733	0.311397	2.24433	RPA1//BRCA1//POLR2I//TCEA1//PARP2//TDG//KAT5//XRCC5//BRCC3//NHEJ1//AXIN2//PARG//RBM14//CRY1//SHPRH//EPC2//NONO//INTS3//SSRP1//UBE2D3//CDC14B//SMC3//MORF4L2
GO:0007049	cell cycle	Biological process	61	1167	554	14586	1.37621	0.00652805	0.351555	2.18522	ANAPC4//ANAPC5//PSMD5//RPA1//RFWD2//MCM8//CDC23//CCNG2//CDKN2C//GTPBP4//PPP6C//PRIM2//CUL2//KHDRBS1//PRKAR2B//TAF2//CEP57//STAG1//STAG2//NSL1//KIF2A//NUP133//MIS12//SMC3//TOP2B//HBP1//IRF6//PRKAG2//MAPRE2//WAPAL//SEPT2//NEDD9//PAPD5//MAP9//SETDB2//SEPT7//PRCC//BRCA1//EIF4G3//AATF//ROCK2//BRCC3//CDC14B//DLG1//INTS3//NR2F2//HDAC2//PTPRK//CTCF//AXIN2//ESCO1//SEPT10//SEPT6//VPS24//BANP//ARL8B//CCAR1/…
GO:0006399	tRNA metabolic process	Biological process	11	123	554	14586	2.35458	0.00714177	0.379031	2.14619	HARS2//HARS//KARS//IARS2//TARS//RPP14//TYW1B//TRMT6//PUS7//PUS3//TRNT1
GO:0006739	NADP metabolic process	Biological process	4	21	554	14586	5.01496	0.00736169	0.385122	2.13302	HIBADH//RPIA//IDH1//ME1
GO:0051603	proteolysis involved in cellular protein catabolic process	Biological process	23	350	554	14586	1.73016	0.0077202	0.398188	2.11237	MYLIP//TRIP12//KIAA0317//USP33//ARIH1//ANAPC4//USP50//ANAPC5//NUB1//UBE2D3//FBXO11//CUL2//CDC23//USP13//USP15//ZMPSTE24//HSP90B1//RNF103//PSMD5//HSP90AB1//DAB2//GCLC//TBL1X
GO:0031323	regulation of cellular metabolic process	Biological process	178	4012	554	14586	1.16811	0.00805631	0.409753	2.09386	KPNA1//CDKN2C//GTPBP4//RYBP//SUZ12//FOXD3//NFX1//NR2F2//ZNF148//NRIP1//PIAS1//CRK//MBNL1//FAM129A//DAB2//NPTN//AXIN2//EIF4G3//ERRFI1//SNX6//PRKAG2//ESCO1//SMC3//HDAC2//AEBP2//ZNF573//ZNF555//TSC22D3//ARID2//ZFP82//HIVEP2//HNRNPD//HOXA9//HOXA10//ZNF429//IRF6//MEF2A//ZNF506//NFIB//ZNF44//ZNF350//TOP2B//ZNF12//ZNF75A//ZNF131//ZNF187//CSDE1//ZNF426//LASS5//CNOT8//TFAM//HTATSF1//UBN1//BRCA1//TCEA1//TC…
GO:0016570	histone modification	Biological process	15	198	554	14586	1.99458	0.00865429	0.430605	2.06277	CDC73//CTR9//SUZ12//KAT5//RBM14//HDAC2//ATXN7//KDM1A//WDR92//SUV420H1//ACTL6A//MSL3//SETDB2//BRCC3//RTF1
GO:0009108	coenzyme biosynthetic process	Biological process	9	93	554	14586	2.54792	0.00874403	0.430605	2.05829	MAT2B//MAT2A//QDPR//ME1//PDHA1//PDK4//PANK1//ACSL1//ELOVL5
GO:0006511	ubiquitin-dependent protein catabolic process	Biological process	22	334	554	14586	1.73421	0.00881904	0.430605	2.05458	MYLIP//TRIP12//KIAA0317//HSP90B1//RNF103//ANAPC4//ANAPC5//PSMD5//CDC23//HSP90AB1//DAB2//GCLC//NUB1//TBL1X//UBE2D3//USP33//ARIH1//USP50//FBXO11//CUL2//USP13//USP15
GO:0006401	RNA catabolic process	Biological process	10	111	554	14586	2.37194	0.00959103	0.462136	2.01813	NCBP2//PNRC2//DCP1A//UPF3B//C2ORF29//CNOT8//PNPT1//PAPD5//XRN2//HNRNPD
GO:0016569	covalent chromatin modification	Biological process	15	201	554	14586	1.96481	0.00986532	0.469179	2.00589	CDC73//CTR9//RTF1//SUZ12//KAT5//RBM14//HDAC2//ATXN7//KDM1A//WDR92//SUV420H1//ACTL6A//MSL3//SETDB2//BRCC3
GO:0001889	liver development	Biological process	7	64	554	14586	2.87968	0.0104909	0.490012	1.97919	ALDH2//ALDH9A1//ICMT//ACAT1//MAN2A1//NF1//PTCD2
GO:0080090	regulation of primary metabolic process	Biological process	175	3964	554	14586	1.16233	0.0106282	0.490012	1.97354	KPNA1//CDKN2C//GTPBP4//RYBP//SUZ12//FOXD3//NFX1//NR2F2//ZNF148//NRIP1//PIAS1//CRK//MBNL1//FAM129A//DAB2//NPTN//AXIN2//EIF4G3//ERRFI1//SNX6//PRKAG2//ESCO1//SMC3//HDAC2//AEBP2//ZNF573//ZNF555//TSC22D3//ARID2//ZFP82//HIVEP2//HNRNPD//HOXA9//HOXA10//ZNF429//IRF6//MEF2A//ZNF506//NFIB//ZNF44//ZNF350//TOP2B//ZNF12//ZNF75A//ZNF131//ZNF187//CSDE1//ZNF426//LASS5//CNOT8//TFAM//HTATSF1//UBN1//BRCA1//TCEA1//TC…
GO:0051649	establishment of localization in cell	Biological process	66	1313	554	14586	1.32344	0.0110384	0.490012	1.95709	NUP205//CEP57//GOLGA5//WDR1//PEX19//NCBP2//NUP133//UPF3B//THOC1//KPNA1//IPO5//HSPA9//SEC63//ICMT//EXOC4//SRP54//AP3B1//TRNT1//PRKAG2//SLC25A20//AP3S2//SEC23IP//CSE1L//STX2//RAB3GAP2//GGA1//ARFGAP3//MYO6//SYTL2//BCAP29//SNX6//COG3//USO1//COPB2//SEC24D//EXOC5//EXOC1//VAMP7//TMX1//SCFD1//SH3D19//TXNDC5//SCAMP1//PUM1//VPS26A//CDC23//PPT1//KCNB1//PRKAR2A//PRKAR2B//RAP1B//KIF13A//RAB7A//MAOB//VPS4B//LG…
GO:0006325	chromatin organization	Biological process	28	465	554	14586	1.58537	0.0110895	0.490012	1.95509	KAT5//MSL3//SHPRH//HDAC2//SMARCA1//ACTL6A//CDC73//CTR9//CTCF//AEBP2//DAPK3//ARID2//KDM1A//SUZ12//EPC2//UBN1//SUV420H1//KDM3B//MBTD1//BANP//UTY//BRCC3//SETDB2//MORF4L2//RTF1//RBM14//ATXN7//WDR92
GO:0016053	organic acid biosynthetic process	Biological process	17	242	554	14586	1.84952	0.0111062	0.490012	1.95443	PTGDS//UGP2//GOT2//GLUD2//MAT2B//MAT2A//PTPLAD1//CYP39A1//SCP2//GCLC//BHMT2//PLA2G4A//ELOVL5//PRKAG2//ACAT1//ALDH9A1//BRCA1
GO:0046394	carboxylic acid biosynthetic process	Biological process	17	242	554	14586	1.84952	0.0111062	0.490012	1.95443	PTGDS//UGP2//GOT2//GLUD2//MAT2B//MAT2A//PTPLAD1//CYP39A1//SCP2//GCLC//BHMT2//PLA2G4A//ELOVL5//PRKAG2//ACAT1//ALDH9A1//BRCA1
GO:0007091	mitotic metaphase/anaphase transition	Biological process	6	50	554	14586	3.15942	0.0112474	0.490333	1.94895	ANAPC4//ANAPC5//CDC23//STAG1//STAG2//SMC3
GO:0061008	hepaticobiliary system development	Biological process	7	65	554	14586	2.83538	0.0113838	0.490442	1.94371	ALDH2//ALDH9A1//ICMT//ACAT1//MAN2A1//NF1//PTCD2
GO:0006359	regulation of transcription from RNA polymerase III promoter	Biological process	3	13	554	14586	6.07581	0.0117239	0.491311	1.93093	MAF1//POLR3F//BRCA1
GO:0032438	melanosome organization	Biological process	3	13	554	14586	6.07581	0.0117239	0.491311	1.93093	BLOC1S2//KIF13A//AP3B1
GO:0045786	negative regulation of cell cycle	Biological process	24	384	554	14586	1.64553	0.0118137	0.491311	1.92761	ANAPC4//ANAPC5//PSMD5//RPA1//RFWD2//MCM8//CDC23//CCNG2//CDKN2C//KHDRBS1//HBP1//IRF6//PRKAG2//CUL2//PRCC//BRCA1//BRCC3//CDC14B//DLG1//INTS3//NR2F2//TOP2B//HDAC2//PTPRK
GO:0044281	small molecule metabolic process	Biological process	98	2076	554	14586	1.24287	0.0119407	0.491311	1.92297	PTGDS//SLC25A17//ALDH1A3//GOT2//PDK4//PGM1//PIK3CA//PGM2//PYGB//UGP2//MAN2A1//ADH1A//ALDH2//ADH1B//ADH1C//ALDH1A1//PDHA1//BSG//IDH1//HIBADH//RPIA//ME1//PRKAG2//GPX3//DCK//NME7//EIF2S3//GTPBP4//GNB2//ARL8B//RAB22A//RAB5A//RAP1B//SRP54//RAB7A//RHOBTB3//OLA1//VPS4B//DCTD//HARS2//HARS//KARS//IARS2//TARS//ICMT//GLUD2//SCLY//CCBL2//QDPR//PSMD5//GCLC//MAT2B//MAT2A//SLC27A4//ACSL1//PNPLA8//CROT//PRKAR2B/…
GO:0007034	vacuolar transport	Biological process	5	37	554	14586	3.55791	0.0123922	0.504226	1.90685	AP3B1//KIF13A//VAMP7//RAB7A//VPS26A
GO:0008380	RNA splicing	Biological process	20	305	554	14586	1.72646	0.0127227	0.511985	1.89542	SLU7//HNRNPM//MBNL1//NCBP2//HNRNPR//CWC27//SKIV2L2//HNRNPD//HNRNPF//HNRNPH3//HNRNPU//POLR2I//CCAR1//UPF3B//MBNL2//NONO//PRPF39//RBM28//CIR1//THOC1
GO:0010467	gene expression	Biological process	173	3936	554	14586	1.15722	0.0132322	0.526697	1.87837	RYBP//SUZ12//FOXD3//NFX1//NR2F2//ZNF148//NRIP1//PIAS1//C2ORF29//CNOT8//SLU7//HNRNPM//MBNL1//NCBP2//HNRNPR//CWC27//SKIV2L2//HNRNPD//HNRNPF//HNRNPH3//HNRNPU//POLR2I//CCAR1//UPF3B//EIF3A//CTCF//POLR3F//TH1L//POLR1E//SSRP1//TCEA1//TFAM//CDC73//TSC22D3//ETS2//AATF//GTF2I//UBN1//IRF6//MEF2A//NFIB//KLF3//RFXAP//TCF15//ZNF131//ZNF187//CIR1//RTF1//TAF9B//XRN2//AEBP2//ZNF573//ZNF555//ARID2//ZFP82//HIVEP2//…
GO:0042147	retrograde transport, endosome to Golgi	Biological process	4	25	554	14586	4.21256	0.013807	0.530903	1.8599	RHOBTB3//VPS35//SNX6//VPS26A
GO:0070979	protein K11-linked ubiquitination	Biological process	4	25	554	14586	4.21256	0.013807	0.530903	1.8599	ANAPC4//ANAPC5//UBE2D3//CDC23
GO:0006260	DNA replication	Biological process	17	248	554	14586	1.80478	0.0138912	0.530903	1.85726	RPA1//TFAM//TOP2B//PRIM2//MCM8//ESCO1//SMC3//WAPAL//GTPBP4//STAG2//RBM14//NFIB//RRM1//PAPD5//BRCA1//SSRP1//TMX1
GO:0007050	cell cycle arrest	Biological process	21	328	554	14586	1.68567	0.0139177	0.530903	1.85643	ANAPC4//ANAPC5//PSMD5//RPA1//RFWD2//MCM8//CDC23//CCNG2//PRCC//BRCA1//BRCC3//CDC14B//DLG1//INTS3//TOP2B//CDKN2C//KHDRBS1//HBP1//IRF6//PRKAG2//CUL2
GO:0032787	monocarboxylic acid metabolic process	Biological process	22	349	554	14586	1.65968	0.0141687	0.531234	1.84867	PTGDS//SLC25A17//ALDH1A3//UGP2//PDHA1//PDK4//BSG//IDH1//SLC27A4//ACSL1//PNPLA8//CROT//PRKAR2B//PTPLAD1//PLA2G4A//CYP39A1//SCP2//PRKAG2//ELOVL5//ACAT1//BRCA1//SLC25A20
GO:0000380	alternative nuclear mRNA splicing, via spliceosome	Biological process	3	14	554	14586	5.64183	0.0145067	0.531234	1.83843	MBNL1//SLU7//HNRNPM
GO:0006740	NADPH regeneration	Biological process	3	14	554	14586	5.64183	0.0145067	0.531234	1.83843	HIBADH//RPIA//IDH1
GO:0048753	pigment granule organization	Biological process	3	14	554	14586	5.64183	0.0145067	0.531234	1.83843	BLOC1S2//KIF13A//AP3B1
GO:0010564	regulation of cell cycle process	Biological process	21	331	554	14586	1.67039	0.0152729	0.55143	1.81608	ANAPC4//ANAPC5//PSMD5//RPA1//RFWD2//MCM8//CDC23//CCNG2//PRCC//ROCK2//BRCA1//BRCC3//CDC14B//DLG1//INTS3//STAG2//SMC3//WAPAL//CTCF//AXIN2//TOP2B
GO:0010948	negative regulation of cell cycle process	Biological process	7	69	554	14586	2.67101	0.0155099	0.55143	1.80939	ANAPC4//ANAPC5//CDC23//STAG2//SMC3//WAPAL//BRCA1
GO:0043473	pigmentation	Biological process	7	69	554	14586	2.67101	0.0155099	0.55143	1.80939	FOXD3//BLOC1S2//KIF13A//AP3B1//MUTED//NF1//HPS3
GO:0009163	nucleoside biosynthetic process	Biological process	4	26	554	14586	4.05054	0.0158387	0.552394	1.80028	MAT2B//MAT2A//DCK//DCTD
GO:0048278	vesicle docking	Biological process	4	26	554	14586	4.05054	0.0158387	0.552394	1.80028	SCFD1//SYTL2//EXOC4//EXOC5
GO:0045732	positive regulation of protein catabolic process	Biological process	6	54	554	14586	2.92539	0.0161083	0.556497	1.79295	DAB2//GCLC//NUB1//SH3D19//EGLN2//MYLIP
GO:0008543	fibroblast growth factor receptor signaling pathway	Biological process	7	70	554	14586	2.63285	0.0166882	0.567364	1.77759	NPTN//FGF7//PIK3C3//PIK3CA//SHOC2//FGF18//CEP57
GO:0000075	cell cycle checkpoint	Biological process	15	214	554	14586	1.84546	0.0167328	0.567364	1.77643	PSMD5//RFWD2//PRCC//ANAPC4//ANAPC5//CDC23//BRCA1//BRCC3//CDC14B//DLG1//INTS3//TOP2B//RPA1//MCM8//CCNG2
GO:0006402	mRNA catabolic process	Biological process	8	87	554	14586	2.42101	0.017405	0.581649	1.75933	NCBP2//PNRC2//DCP1A//UPF3B//C2ORF29//CNOT8//PAPD5//PNPT1
GO:0032365	intracellular lipid transport	Biological process	3	15	554	14586	5.2657	0.0176305	0.581649	1.75373	PRKAG2//SLC25A20//VPS4B
GO:0051983	regulation of chromosome segregation	Biological process	3	15	554	14586	5.2657	0.0176305	0.581649	1.75373	WAPAL//CTCF//AXIN2
GO:0048284	organelle fusion	Biological process	4	27	554	14586	3.90052	0.0180487	0.582866	1.74355	VAMP7//ANXA2//PLA2G4A//USO1
GO:0000377	RNA splicing, via transesterification reactions with bulged adenosine as nucleophile	Biological process	14	197	554	14586	1.87106	0.0183054	0.582866	1.73742	SLU7//HNRNPM//MBNL1//NCBP2//HNRNPR//CWC27//SKIV2L2//HNRNPD//HNRNPF//HNRNPH3//HNRNPU//POLR2I//CCAR1//UPF3B
GO:0000398	nuclear mRNA splicing, via spliceosome	Biological process	14	197	554	14586	1.87106	0.0183054	0.582866	1.73742	SLU7//HNRNPM//MBNL1//NCBP2//HNRNPR//CWC27//SKIV2L2//HNRNPD//HNRNPF//HNRNPH3//HNRNPU//POLR2I//CCAR1//UPF3B
GO:0006354	transcription elongation, DNA-dependent	Biological process	8	88	554	14586	2.3935	0.0185324	0.582866	1.73207	NCBP2//TH1L//POLR2I//SSRP1//TCEA1//POLR3F//HTATSF1//THOC1
GO:0016197	endosome transport	Biological process	8	88	554	14586	2.3935	0.0185324	0.582866	1.73207	KIF13A//VAMP7//RAB7A//VPS4B//RHOBTB3//VPS35//SNX6//VPS26A
GO:0051052	regulation of DNA metabolic process	Biological process	11	141	554	14586	2.054	0.0186224	0.582866	1.72996	KPNA1//ESCO1//SMC3//WAPAL//GTPBP4//AXIN2//STAG2//BRCA1//BRCC3//PARG//IL27RA
GO:0006888	ER to Golgi vesicle-mediated transport	Biological process	5	41	554	14586	3.2108	0.0188336	0.584481	1.72507	SEC24D//SCFD1//VAMP7//TMX1//COG3
GO:0051641	cellular localization	Biological process	70	1445	554	14586	1.27543	0.0195091	0.600357	1.70976	NUP205//CEP57//GOLGA5//WDR1//PEX19//NCBP2//NUP133//UPF3B//THOC1//KPNA1//IPO5//HSPA9//SEC63//ICMT//EXOC4//SRP54//AP3B1//TRNT1//PRKAG2//SLC25A20//AP3S2//SEC23IP//CSE1L//STX2//RAB3GAP2//GGA1//ARFGAP3//MYO6//SYTL2//BCAP29//SNX6//COG3//USO1//COPB2//SEC24D//EXOC5//EXOC1//VAMP7//TMX1//SCFD1//SH3D19//TXNDC5//SCAMP1//PUM1//VPS26A//CDC23//PPT1//KCNB1//PRKAR2A//PRKAR2B//RAP1B//KIF13A//RAB7A//MAOB//VPS4B//LG…
GO:0001522	pseudouridine synthesis	Biological process	3	16	554	14586	4.9366	0.0210987	0.63854	1.67574	PUS3//PUS7//RPUSD4
GO:0006536	glutamate metabolic process	Biological process	3	16	554	14586	4.9366	0.0210987	0.63854	1.67574	GLUD2//GOT2//GCLC
GO:0044264	cellular polysaccharide metabolic process	Biological process	7	74	554	14586	2.49054	0.0220356	0.661002	1.65688	PRKAG2//PGM1//PGM2//UGP2//PYGB//HS2ST1//MAT2B
GO:0000375	RNA splicing, via transesterification reactions	Biological process	14	202	554	14586	1.82475	0.0222019	0.661002	1.65361	SLU7//HNRNPM//MBNL1//NCBP2//HNRNPR//CWC27//SKIV2L2//HNRNPD//HNRNPF//HNRNPH3//HNRNPU//POLR2I//CCAR1//UPF3B
GO:0006520	cellular amino acid metabolic process	Biological process	23	386	554	14586	1.5688	0.0223945	0.66136	1.64986	GPX3//IDH1//HARS2//HARS//KARS//IARS2//TARS//PSMD5//GOT2//GCLC//GLUD2//MAT2B//MAT2A//QDPR//CCBL2//HIBADH//ACAT1//BHMT2//PANK1//TASP1//ALDH9A1//ICMT//SCLY
GO:0006310	DNA recombination	Biological process	12	164	554	14586	1.92648	0.0226324	0.66304	1.64527	KPNA1//TOP2B//PRIM2//RPA1//BRCA1//SWAP70//XRCC5//IL27RA//RBM14//NONO//TSN//NHEJ1
GO:0051188	cofactor biosynthetic process	Biological process	10	127	554	14586	2.07311	0.0228583	0.663752	1.64096	MAT2B//MAT2A//QDPR//ME1//FXN//PANK1//PDHA1//PDK4//ACSL1//ELOVL5
GO:0006282	regulation of DNA repair	Biological process	4	29	554	14586	3.63152	0.0230193	0.663752	1.63791	AXIN2//BRCA1//BRCC3//PARG
GO:0071156	regulation of cell cycle arrest	Biological process	15	223	554	14586	1.77098	0.0233104	0.666896	1.63245	ANAPC4//ANAPC5//PSMD5//RPA1//RFWD2//MCM8//CDC23//CCNG2//PRCC//BRCA1//BRCC3//CDC14B//DLG1//INTS3//TOP2B
GO:0019222	regulation of metabolic process	Biological process	186	4331	554	14586	1.13071	0.0241428	0.680171	1.61721	KPNA1//CDKN2C//GTPBP4//RYBP//SUZ12//FOXD3//NFX1//NR2F2//ZNF148//NRIP1//PIAS1//CRK//MBNL1//FAM129A//DAB2//NPTN//AXIN2//EIF4G3//ERRFI1//SNX6//PRKAG2//ESCO1//SMC3//HDAC2//CTCF//AEBP2//ZNF573//ZNF555//TSC22D3//ARID2//ZFP82//HIVEP2//HNRNPD//HOXA9//HOXA10//ZNF429//IRF6//MEF2A//ZNF506//NFIB//ZNF44//ZNF350//TOP2B//ZNF12//ZNF75A//ZNF131//ZNF187//CSDE1//ZNF426//LASS5//CNOT8//TFAM//HTATSF1//UBN1//BRCA1//TCE…
GO:0051726	regulation of cell cycle	Biological process	32	584	554	14586	1.44266	0.0241459	0.680171	1.61716	ANAPC4//ANAPC5//PSMD5//RPA1//RFWD2//MCM8//CDC23//CCNG2//CDKN2C//GTPBP4//KHDRBS1//HBP1//IRF6//PRKAG2//CUL2//PRCC//AATF//ROCK2//BRCA1//BRCC3//CDC14B//DLG1//INTS3//STAG2//SMC3//NR2F2//HDAC2//PTPRK//WAPAL//CTCF//AXIN2//TOP2B
GO:0000272	polysaccharide catabolic process	Biological process	5	44	554	14586	2.99188	0.0248919	0.681411	1.60394	PGM1//PGM2//PYGB//LYVE1//GNS
GO:0001937	negative regulation of endothelial cell proliferation	Biological process	3	17	554	14586	4.64621	0.0249124	0.681411	1.60358	NF1//NR2F2//KRIT1
GO:0043616	keratinocyte proliferation	Biological process	3	17	554	14586	4.64621	0.0249124	0.681411	1.60358	FGF7//PTPRK//IRF6
GO:0044282	small molecule catabolic process	Biological process	37	697	554	14586	1.39764	0.0249342	0.681411	1.6032	SLC25A17//PDHA1//HIBADH//RPIA//PRKAG2//EIF2S3//GTPBP4//GNB2//ARL8B//RAB22A//RAB5A//RAP1B//SRP54//RAB7A//RHOBTB3//OLA1//VPS4B//GOT2//GLUD2//QDPR//CCBL2//ACAT1//PGM1//CYP39A1//ARFGAP3//TBC1D22A//TBC1D23//TBC1D15//NF1//RGN//TASP1//CROT//SCP2//RAB3GAP1//RAB3GAP2//GDI2//TDG
GO:0032259	methylation	Biological process	9	111	554	14586	2.13474	0.0253844	0.688577	1.59543	ICMT//CTCF//SUZ12//WDR92//SUV420H1//FBXO11//SETDB2//MAT2B//MAT2A
GO:0000184	nuclear-transcribed mRNA catabolic process, nonsense-mediated decay	Biological process	4	30	554	14586	3.51047	0.0257863	0.689265	1.58861	NCBP2//PNRC2//DCP1A//UPF3B
GO:0007031	peroxisome organization	Biological process	4	30	554	14586	3.51047	0.0257863	0.689265	1.58861	PEX19//AP3B1//ABCD3//SCP2
GO:0009308	amine metabolic process	Biological process	30	544	554	14586	1.45194	0.0263475	0.696861	1.57926	LYVE1//GNS//GPX3//IDH1//HARS2//HARS//KARS//IARS2//TARS//GLUD2//SCLY//CCBL2//QDPR//PSMD5//GOT2//GCLC//MAT2B//MAT2A//HIBADH//FGF7//PLA2G4A//ACAT1//BHMT2//PANK1//MAMDC2//HS2ST1//TASP1//ALDH9A1//MAOB//ICMT
GO:0022402	cell cycle process	Biological process	45	882	554	14586	1.34329	0.026451	0.696861	1.57756	ANAPC4//ANAPC5//PSMD5//RPA1//RFWD2//MCM8//CDC23//CCNG2//CDKN2C//PPP6C//PRIM2//CUL2//KHDRBS1//PRKAR2B//TAF2//CEP57//STAG1//STAG2//NSL1//KIF2A//NUP133//MIS12//SMC3//TOP2B//HBP1//IRF6//PRKAG2//MAPRE2//WAPAL//SEPT2//NEDD9//PAPD5//MAP9//SETDB2//SEPT7//PRCC//BRCA1//EIF4G3//ROCK2//BRCC3//CDC14B//DLG1//INTS3//CTCF//AXIN2
GO:0015718	monocarboxylic acid transport	Biological process	7	77	554	14586	2.3935	0.0267522	0.69976	1.57264	PRKAG2//SLC25A20//BSG//SLC17A5//SLC27A4//GOT2//ABCD3
GO:0033692	cellular polysaccharide biosynthetic process	Biological process	5	45	554	14586	2.92539	0.0271588	0.705358	1.56609	PGM1//PGM2//UGP2//HS2ST1//MAT2B
GO:0060255	regulation of macromolecule metabolic process	Biological process	164	3791	554	14586	1.13898	0.0281471	0.725878	1.55057	KPNA1//CDKN2C//GTPBP4//RYBP//SUZ12//FOXD3//NFX1//NR2F2//ZNF148//NRIP1//PIAS1//CRK//MBNL1//FAM129A//DAB2//NPTN//AXIN2//EIF4G3//ERRFI1//SNX6//PRKAG2//ESCO1//SMC3//HDAC2//CTCF//AEBP2//ZNF573//ZNF555//TSC22D3//ARID2//ZFP82//HIVEP2//HNRNPD//HOXA9//HOXA10//ZNF429//IRF6//MEF2A//ZNF506//NFIB//ZNF44//ZNF350//TOP2B//ZNF12//ZNF75A//ZNF131//ZNF187//CSDE1//ZNF426//LASS5//CNOT8//TFAM//HTATSF1//UBN1//BRCA1//TCE…
GO:0000278	mitotic cell cycle	Biological process	35	659	554	14586	1.39833	0.0284727	0.72914	1.54557	CDKN2C//CDC23//PPP6C//PRIM2//PSMD5//RPA1//MCM8//CUL2//KHDRBS1//ANAPC4//ANAPC5//PRKAR2B//TAF2//CEP57//STAG1//STAG2//NSL1//KIF2A//NUP133//MIS12//SMC3//MAPRE2//WAPAL//SEPT2//NEDD9//PAPD5//MAP9//SETDB2//CCNG2//SEPT7//PRCC//AATF//DLG1//TOP2B
GO:0022406	membrane docking	Biological process	4	31	554	14586	3.39723	0.0287446	0.730991	1.54144	SCFD1//SYTL2//EXOC4//EXOC5
GO:0006513	protein monoubiquitination	Biological process	3	18	554	14586	4.38809	0.0290711	0.734196	1.53654	CDC73//CTR9//UBE2D3
GO:0030029	actin filament-based process	Biological process	20	333	554	14586	1.58129	0.029509	0.734989	1.53005	NEDD9//LIMA1//GSN//FMNL2//CRK//ARFIP2//CXCL1//NF1//PDPK1//ROCK2//MTSS1//DLG1//WASL//MYO6//DMD//TPM3//CNN3//HSP90B1//EPS8//FGF7
GO:0016070	RNA metabolic process	Biological process	130	2944	554	14586	1.1626	0.029769	0.734989	1.52624	RYBP//SUZ12//FOXD3//NFX1//NR2F2//ZNF148//NRIP1//PIAS1//NCBP2//PNRC2//DCP1A//UPF3B//C2ORF29//CNOT8//SLU7//HNRNPM//MBNL1//HNRNPR//CWC27//SKIV2L2//HNRNPD//HNRNPF//HNRNPH3//HNRNPU//POLR2I//CCAR1//PUS7//RPUSD4//PRIM2//POLR3F//CTCF//TSC22D3//ETS2//AATF//GTF2I//UBN1//IRF6//MEF2A//NFIB//KLF3//RFXAP//TCF15//ZNF131//ZNF187//CIR1//RTF1//TAF9B//XRN2//AEBP2//ZNF573//ZNF555//ARID2//ZFP82//HIVEP2//HOXA9//HOXA10…
GO:0051171	regulation of nitrogen compound metabolic process	Biological process	144	3296	554	14586	1.15028	0.030345	0.734989	1.51791	KPNA1//RYBP//SUZ12//FOXD3//NFX1//NR2F2//ZNF148//NRIP1//PIAS1//MBNL1//ESCO1//SMC3//HDAC2//AEBP2//ZNF573//ZNF555//TSC22D3//ARID2//ZFP82//HIVEP2//HNRNPD//HOXA9//HOXA10//ZNF429//IRF6//MEF2A//ZNF506//NFIB//ZNF44//ZNF350//TOP2B//ZNF12//ZNF75A//ZNF131//ZNF187//CSDE1//ZNF426//LASS5//CNOT8//TFAM//CRK//HTATSF1//UBN1//BRCA1//TCEA1//TCF15//VEZF1//C19ORF2//RNF14//POLR3F//PSMD5//EDNRB//WAPAL//GTPBP4//KDM1A//TA…
GO:0044106	cellular amine metabolic process	Biological process	26	463	554	14586	1.47849	0.0305093	0.734989	1.51557	GPX3//IDH1//HARS2//HARS//KARS//IARS2//TARS//GLUD2//SCLY//CCBL2//QDPR//PSMD5//GOT2//GCLC//MAT2B//MAT2A//HIBADH//FGF7//PLA2G4A//ACAT1//BHMT2//PANK1//TASP1//ALDH9A1//MAOB//ICMT
GO:0019219	regulation of nucleobase, nucleoside, nucleotide and nucleic acid metabolic process	Biological process	141	3224	554	14586	1.15146	0.0312394	0.734989	1.5053	KPNA1//RYBP//SUZ12//FOXD3//NFX1//NR2F2//ZNF148//NRIP1//PIAS1//MBNL1//ESCO1//SMC3//HDAC2//AEBP2//ZNF573//ZNF555//TSC22D3//ARID2//ZFP82//HIVEP2//HNRNPD//HOXA9//HOXA10//ZNF429//IRF6//MEF2A//ZNF506//NFIB//ZNF44//ZNF350//TOP2B//ZNF12//ZNF75A//ZNF131//ZNF187//CSDE1//ZNF426//LASS5//CNOT8//TFAM//CRK//HTATSF1//UBN1//BRCA1//TCEA1//TCF15//VEZF1//C19ORF2//RNF14//POLR3F//EDNRB//WAPAL//GTPBP4//KDM1A//TAF2//KAT…
GO:0005976	polysaccharide metabolic process	Biological process	10	134	554	14586	1.96481	0.0316222	0.734989	1.50001	PRKAG2//PGM1//PGM2//UGP2//PYGB//LYVE1//GNS//HS2ST1//MAMDC2//MAT2B
GO:0051186	cofactor metabolic process	Biological process	15	232	554	14586	1.70227	0.0316637	0.734989	1.49944	HIBADH//RPIA//IDH1//MAT2B//MAT2A//QDPR//ME1//FXN//PANK1//PDHA1//PDK4//ACSL1//ELOVL5//EIF2AK1//PPT1
GO:0006081	cellular aldehyde metabolic process	Biological process	4	32	554	14586	3.29106	0.0318961	0.734989	1.49626	IDH1//ALDH1A3//ALDH1A1//ALDH9A1
GO:0006997	nucleus organization	Biological process	4	32	554	14586	3.29106	0.0318961	0.734989	1.49626	ZMPSTE24//NUP133//SYNE1//ATXN7
GO:0007041	lysosomal transport	Biological process	4	32	554	14586	3.29106	0.0318961	0.734989	1.49626	AP3B1//KIF13A//VAMP7//RAB7A
GO:0015909	long-chain fatty acid transport	Biological process	4	32	554	14586	3.29106	0.0318961	0.734989	1.49626	PRKAG2//SLC25A20//ABCD3//SLC27A4
GO:0015908	fatty acid transport	Biological process	5	47	554	14586	2.80091	0.032076	0.734989	1.49382	PRKAG2//SLC25A20//SLC27A4//ABCD3//GOT2
GO:0045862	positive regulation of proteolysis	Biological process	5	47	554	14586	2.80091	0.032076	0.734989	1.49382	DAB2//GCLC//NUB1//SH3D19//HDAC2
GO:0000956	nuclear-transcribed mRNA catabolic process	Biological process	7	80	554	14586	2.30375	0.0321131	0.734989	1.49332	NCBP2//PNRC2//DCP1A//UPF3B//C2ORF29//CNOT8//PAPD5
GO:0008033	tRNA processing	Biological process	7	80	554	14586	2.30375	0.0321131	0.734989	1.49332	PUS3//TRNT1//RPP14//KARS//TYW1B//TRMT6//PUS7
GO:0044255	cellular lipid metabolic process	Biological process	35	667	554	14586	1.38156	0.0331272	0.753489	1.47982	PTGDS//SLC25A17//ALDH1A3//GPLD1//SLC27A4//ACSL1//PNPLA8//CROT//PRKAR2B//PTPLAD1//FGF7//SERINC1//PTDSS1//PLA2G4A//COL4A3BP//LASS5//ORMDL1//GALC//AGPS//LPCAT3//MBOAT1//PIGK//PRKAG2//ELOVL5//PPT1//SCP2//DHRS3//ACAT1//BRCA1//SLC25A20//PIK3CA//SACM1L//IDH1//ME1//TBL1X
GO:0016054	organic acid catabolic process	Biological process	11	155	554	14586	1.86848	0.0343283	0.766145	1.46435	SLC25A17//GOT2//GLUD2//QDPR//CCBL2//HIBADH//ACAT1//CYP39A1//TASP1//CROT//SCP2
GO:0046395	carboxylic acid catabolic process	Biological process	11	155	554	14586	1.86848	0.0343283	0.766145	1.46435	SLC25A17//GOT2//GLUD2//QDPR//CCBL2//HIBADH//ACAT1//CYP39A1//TASP1//CROT//SCP2
GO:0006418	tRNA aminoacylation for protein translation	Biological process	5	48	554	14586	2.74255	0.0347297	0.766145	1.4593	HARS2//HARS//IARS2//KARS//TARS
GO:0043038	amino acid activation	Biological process	5	48	554	14586	2.74255	0.0347297	0.766145	1.4593	HARS2//HARS//KARS//IARS2//TARS
GO:0043039	tRNA aminoacylation	Biological process	5	48	554	14586	2.74255	0.0347297	0.766145	1.4593	HARS2//HARS//KARS//IARS2//TARS
GO:0006790	sulfur compound metabolic process	Biological process	10	138	554	14586	1.90786	0.037575	0.80511	1.4251	GPX3//IDH1//GCLC//MAT2B//MAT2A//BHMT2//HS2ST1//MAMDC2//GNS//ICMT
GO:0000280	nuclear division	Biological process	19	321	554	14586	1.55839	0.0377247	0.80511	1.42337	ANAPC4//ANAPC5//STAG1//STAG2//NSL1//KIF2A//NUP133//MIS12//SMC3//MAPRE2//WAPAL//SEPT2//NEDD9//PAPD5//MAP9//SETDB2//CDC23//CCNG2//SEPT7
GO:0007067	mitosis	Biological process	19	321	554	14586	1.55839	0.0377247	0.80511	1.42337	ANAPC4//ANAPC5//STAG1//STAG2//NSL1//KIF2A//NUP133//MIS12//SMC3//CDC23//MAPRE2//WAPAL//SEPT2//NEDD9//PAPD5//MAP9//SETDB2//CCNG2//SEPT7
GO:0006891	intra-Golgi vesicle-mediated transport	Biological process	3	20	554	14586	3.94928	0.0384137	0.80511	1.41551	GOLGA5//COG3//COPB2
GO:0007032	endosome organization	Biological process	3	20	554	14586	3.94928	0.0384137	0.80511	1.41551	PIK3C3//RAB22A//VPS4B
GO:0007176	regulation of epidermal growth factor receptor activity	Biological process	3	20	554	14586	3.94928	0.0384137	0.80511	1.41551	ERRFI1//SNX6//APLP2
GO:0008333	endosome to lysosome transport	Biological process	3	20	554	14586	3.94928	0.0384137	0.80511	1.41551	KIF13A//VAMP7//RAB7A
GO:0031572	G2/M transition DNA damage checkpoint	Biological process	3	20	554	14586	3.94928	0.0384137	0.80511	1.41551	BRCA1//BRCC3//CDC14B
GO:0006479	protein methylation	Biological process	6	66	554	14586	2.3935	0.0388836	0.80511	1.41023	ICMT//SUZ12//WDR92//SUV420H1//FBXO11//SETDB2
GO:0008213	protein alkylation	Biological process	6	66	554	14586	2.3935	0.0388836	0.80511	1.41023	ICMT//SUZ12//WDR92//SUV420H1//FBXO11//SETDB2
GO:0046039	GTP metabolic process	Biological process	18	301	554	14586	1.57446	0.0389144	0.80511	1.40989	NME7//EIF2S3//GTPBP4//GNB2//ARL8B//RAB22A//RAB5A//RAP1B//SRP54//RAB7A//ARFGAP3//TBC1D22A//TBC1D23//TBC1D15//NF1//RAB3GAP1//RAB3GAP2//GDI2
GO:0005975	carbohydrate metabolic process	Biological process	33	631	554	14586	1.37693	0.0393012	0.808545	1.40559	PRKAG2//PGM1//PGM2//UGP2//PYGB//GOT2//PDK4//PIK3CA//MAN2A1//LYVE1//GNS//PDHA1//IDH1//HIBADH//RPIA//ALG3//RPN1//COG3//MAN1C1//HS2ST1//MAN1A1//SEC24D//MAMDC2//UEVLD//MAT2B//ALDH2//NUP205//GALC//GLB1//HAS3//ME1//NUP133//PARG
GO:0009058	biosynthetic process	Biological process	199	4726	554	14586	1.10863	0.0401678	0.809121	1.39612	RBM14//NFIB//PRIM2//RPA1//RRM1//PAPD5//BRCA1//SSRP1//TMX1//MCM8//RYBP//SUZ12//FOXD3//NFX1//NR2F2//ZNF148//NRIP1//PIAS1//ALDH2//ALDH9A1//PTGDS//EIF3A//ALDH1A3//PGM1//PGM2//UGP2//GOT2//NME7//TFAM//TOP2B//ESCO1//SMC3//POLR3F//NCBP2//TH1L//POLR2I//POLR1E//UPF3B//TCEA1//CDC73//CTCF//TSC22D3//ETS2//AATF//GTF2I//UBN1//IRF6//MEF2A//KLF3//RFXAP//TCF15//ZNF131//ZNF187//CNOT8//CIR1//RTF1//TAF9B//XRN2//AEBP2…
GO:0009116	nucleoside metabolic process	Biological process	7	84	554	14586	2.19404	0.0403152	0.809121	1.39453	NME7//MAT2B//MAT2A//PANK1//DCK//DCTD//ICMT
GO:0044249	cellular biosynthetic process	Biological process	195	4624	554	14586	1.11031	0.0403394	0.809121	1.39427	RBM14//NFIB//PRIM2//RPA1//RRM1//PAPD5//BRCA1//SSRP1//TMX1//MCM8//RYBP//SUZ12//FOXD3//NFX1//NR2F2//ZNF148//NRIP1//PIAS1//ALDH2//ALDH9A1//PTGDS//EIF3A//ALDH1A3//PGM1//PGM2//UGP2//GOT2//NME7//TFAM//TOP2B//ESCO1//SMC3//POLR3F//NCBP2//TH1L//POLR2I//POLR1E//UPF3B//TCEA1//CDC73//CTCF//TSC22D3//ETS2//AATF//GTF2I//UBN1//IRF6//MEF2A//KLF3//RFXAP//TCF15//ZNF131//ZNF187//CNOT8//CIR1//RTF1//TAF9B//XRN2//AEBP2…
GO:0030521	androgen receptor signaling pathway	Biological process	5	50	554	14586	2.63285	0.0404339	0.809121	1.39325	RNF14//KAT5//BRCA1//NRIP1//PIAS1
GO:0050434	positive regulation of viral transcription	Biological process	5	50	554	14586	2.63285	0.0404339	0.809121	1.39325	NCBP2//TH1L//POLR2I//SSRP1//TCEA1
GO:0034645	cellular macromolecule biosynthetic process	Biological process	161	3760	554	14586	1.12736	0.0411455	0.818885	1.38568	RBM14//NFIB//PRIM2//RPA1//RRM1//PAPD5//BRCA1//SSRP1//TMX1//MCM8//RYBP//SUZ12//FOXD3//NFX1//NR2F2//ZNF148//NRIP1//PIAS1//EIF3A//PGM1//PGM2//UGP2//TFAM//TOP2B//ESCO1//SMC3//POLR3F//NCBP2//TH1L//POLR2I//POLR1E//UPF3B//TCEA1//CDC73//CTCF//TSC22D3//ETS2//AATF//GTF2I//UBN1//IRF6//MEF2A//KLF3//RFXAP//TCF15//ZNF131//ZNF187//CNOT8//CIR1//RTF1//TAF9B//XRN2//AEBP2//ZNF573//ZNF555//ARID2//ZFP82//HIVEP2//HNRN…
GO:0009205	purine ribonucleoside triphosphate metabolic process	Biological process	24	433	554	14586	1.45932	0.0415688	0.821304	1.38123	NME7//EIF2S3//GTPBP4//GNB2//ARL8B//RAB22A//RAB5A//RAP1B//SRP54//RAB7A//RHOBTB3//OLA1//VPS4B//PRKAG2//ARFGAP3//TBC1D22A//TBC1D23//TBC1D15//NF1//RAB3GAP1//RAB3GAP2//GDI2//NDUFS1//ATP6V1B2
GO:0006730	one-carbon metabolic process	Biological process	11	160	554	14586	1.81009	0.0417156	0.821304	1.3797	ICMT//CTCF//SUZ12//MAT2B//MAT2A//KDM1A//WDR92//SUV420H1//FBXO11//SETDB2//AHCYL1
GO:0009199	ribonucleoside triphosphate metabolic process	Biological process	24	434	554	14586	1.45596	0.0425	0.827061	1.37161	NME7//EIF2S3//GTPBP4//GNB2//ARL8B//RAB22A//RAB5A//RAP1B//SRP54//RAB7A//RHOBTB3//OLA1//VPS4B//PRKAG2//ARFGAP3//TBC1D22A//TBC1D23//TBC1D15//NF1//RAB3GAP1//RAB3GAP2//GDI2//NDUFS1//ATP6V1B2
GO:0030518	steroid hormone receptor signaling pathway	Biological process	7	85	554	14586	2.16823	0.0425602	0.827061	1.371	RBM14//EGLN2//KAT5//BRCA1//NRIP1//PIAS1//RNF14
GO:0006974	response to DNA damage stimulus	Biological process	27	501	554	14586	1.4189	0.0430715	0.827061	1.36581	RPA1//BRCA1//PARP2//RBM14//CRY1//SHPRH//EPC2//NONO//POLR2I//INTS3//SSRP1//TCEA1//TDG//UBE2D3//XRCC5//CDC14B//SMC3//MORF4L2//KAT5//BRCC3//NHEJ1//PSMD5//RFWD2//MYO6//AXIN2//PARG//AATF
GO:0009065	glutamine family amino acid catabolic process	Biological process	3	21	554	14586	3.76122	0.043589	0.827061	1.36062	GLUD2//GOT2//TASP1
GO:0043489	RNA stabilization	Biological process	3	21	554	14586	3.76122	0.043589	0.827061	1.36062	HNRNPD//AXIN2//HNRNPU
GO:0045739	positive regulation of DNA repair	Biological process	3	21	554	14586	3.76122	0.043589	0.827061	1.36062	BRCA1//BRCC3//PARG
GO:0048255	mRNA stabilization	Biological process	3	21	554	14586	3.76122	0.043589	0.827061	1.36062	HNRNPU//HNRNPD//AXIN2
GO:0009144	purine nucleoside triphosphate metabolic process	Biological process	24	436	554	14586	1.44928	0.0444085	0.833629	1.35253	NME7//EIF2S3//GTPBP4//GNB2//ARL8B//RAB22A//RAB5A//RAP1B//SRP54//RAB7A//RHOBTB3//OLA1//VPS4B//PRKAG2//ARFGAP3//TBC1D22A//TBC1D23//TBC1D15//NF1//RAB3GAP1//RAB3GAP2//GDI2//NDUFS1//ATP6V1B2
GO:0031329	regulation of cellular catabolic process	Biological process	17	285	554	14586	1.57047	0.0447405	0.833629	1.3493	PRKAG2//ARFGAP3//TBC1D22A//TBC1D23//TBC1D15//NF1//HSP90AB1//DAB2//GCLC//NUB1//RGN//MYLIP//RAB3GAP1//RAB3GAP2//GDI2//SH3D19//HP
GO:0000236	mitotic prometaphase	Biological process	7	86	554	14586	2.14302	0.0448846	0.833629	1.3479	STAG1//STAG2//NSL1//KIF2A//NUP133//MIS12//SMC3
GO:0051247	positive regulation of protein metabolic process	Biological process	21	371	554	14586	1.49029	0.0450339	0.833629	1.34646	FAM129A//DAB2//NPTN//AXIN2//EIF4G3//PRKAG2//RBM3//BRCA1//GCLC//NUB1//PIAS1//EGLN2//MYLIP//HDAC2//FGF7//SH3D19//ANAPC4//ANAPC5//PSMD5//CDC23//CDC14B
GO:0006732	coenzyme metabolic process	Biological process	12	182	554	14586	1.73595	0.0450733	0.833629	1.34608	HIBADH//RPIA//IDH1//MAT2B//MAT2A//QDPR//ME1//PANK1//PDHA1//PDK4//ACSL1//ELOVL5
GO:0042278	purine nucleoside metabolic process	Biological process	4	36	554	14586	2.92539	0.0464547	0.850586	1.33297	MAT2B//MAT2A//PANK1//ICMT
GO:0046128	purine ribonucleoside metabolic process	Biological process	4	36	554	14586	2.92539	0.0464547	0.850586	1.33297	MAT2B//MAT2A//PANK1//ICMT
GO:2000112	regulation of cellular macromolecule biosynthetic process	Biological process	131	3019	554	14586	1.14244	0.0468478	0.853515	1.32931	RYBP//SUZ12//FOXD3//NFX1//NR2F2//ZNF148//NRIP1//PIAS1//ESCO1//SMC3//HDAC2//AEBP2//ZNF573//ZNF555//TSC22D3//ARID2//ZFP82//HIVEP2//HNRNPD//HOXA9//HOXA10//ZNF429//IRF6//MEF2A//ZNF506//NFIB//ZNF44//ZNF350//TOP2B//ZNF12//ZNF75A//ZNF131//ZNF187//CSDE1//ZNF426//LASS5//CNOT8//TFAM//CRK//HTATSF1//UBN1//BRCA1//TCEA1//TCF15//VEZF1//C19ORF2//RNF14//POLR3F//RBM3//CPEB1//PPP1R15B//PUM1//NCBP2//TRMT6//EIF4G3//W…
GO:0033554	cellular response to stress	Biological process	42	850	554	14586	1.30094	0.0481945	0.869435	1.317	PIK3C3//RPA1//BRCA1//PARP2//RBM14//CRY1//SHPRH//EPC2//NONO//POLR2I//INTS3//SSRP1//TCEA1//TDG//UBE2D3//XRCC5//CDC14B//SMC3//MORF4L2//KAT5//BRCC3//NHEJ1//AATF//PARG//PSMD5//RFWD2//PPP1R15B//MAP4K3//PTPLAD1//EIF2AK1//MAP1B//MYO6//CTNNA1//AXIN2//HDAC2//PTPRK//COL4A3BP//FAM129A//GPX3//MEF2A//FXN//HP
GO:0010639	negative regulation of organelle organization	Biological process	9	125	554	14586	1.89565	0.0486339	0.869435	1.31306	GSN//MAP1B//ANAPC4//ANAPC5//CDC23//LIMA1//WAPAL//BRCA1//FXN
GO:0005980	glycogen catabolic process	Biological process	3	22	554	14586	3.59025	0.0490927	0.869435	1.30898	PGM1//PGM2//PYGB
GO:0007030	Golgi organization	Biological process	3	22	554	14586	3.59025	0.0490927	0.869435	1.30898	SEC23IP//SYNE1//GOLGA5
GO:0016574	histone ubiquitination	Biological process	3	22	554	14586	3.59025	0.0490927	0.869435	1.30898	CDC73//CTR9//SUZ12
GO:0006413	translational initiation	Biological process	6	70	554	14586	2.25673	0.0495404	0.869435	1.30504	EIF3A//NCBP2//TRMT6//EIF4G3//EIF2AK1//EIF2S3
GO:0031397	negative regulation of protein ubiquitination	Biological process	7	88	554	14586	2.09431	0.0497742	0.869435	1.303	ANAPC4//ANAPC5//PSMD5//CDC23//KIAA0776//GTPBP4//GCLC
GO:0043161	proteasomal ubiquitin-dependent protein catabolic process	Biological process	12	185	554	14586	1.7078	0.0499325	0.869435	1.30162	HSP90B1//RNF103//ANAPC4//ANAPC5//PSMD5//CDC23//HSP90AB1//DAB2//GCLC//NUB1//TBL1X//UBE2D3
GO:0000087	M phase of mitotic cell cycle	Biological process	19	332	554	14586	1.50675	0.0499559	0.869435	1.30141	ANAPC4//ANAPC5//STAG1//STAG2//NSL1//KIF2A//NUP133//MIS12//SMC3//MAPRE2//WAPAL//SEPT2//NEDD9//PAPD5//MAP9//SETDB2//CDC23//CCNG2//SEPT7

## Sheet: BP up
#Column "GO.ID" stands for the ID of gene ontology term
#Column "Term" stands for the name of gene ontology term
#Column "Ontology" stands for the ontology of GOID belongs to
#Column "Count" stands for the number of DE genes associated with the listed GOID
#Column "Pop.Hits" stands for the number of background population genes associated with the listed GOID
#Column "List.Total" stands for the total number of DE genes
#Column "Pop.Total" stands for the total number of background population genes
#Column "Fold.Enrichment" stands for the Fold Enrichment value of the GOID, it equals (Count/Pop.Hits)/(List.Total/Pop.Total)
#Column "Pvalue" stands for the significance testing value of the GOID
#Column "FDR" stands for the false discovery rate of the GOID, using Benjamini & Hochberg (1995) method
#Column "Enrichment.Score" stands for the Enrichment Score value of the GOID, it equals (-log10(Pvalue))
#Column "GENES" stands for the DE genes associated with the GOID
GO.ID	Term	Ontology	Count	Pop.Hits	List.Total	Pop.Total	Fold.Enrichment	Pvalue	FDR	Enrichment.Score	GENES
GO:0042572	retinol metabolic process	Biological process	3	12	187	14586	19.5	0.000418941	0.794437	3.37785	RETSAT//RBP1//RBP4
GO:0009888	tissue development	Biological process	24	892	187	14586	2.09865	0.000456495	0.794437	3.34056	TCF21//FGF19//FOXJ1//DAG1//HOXB4//TFAP2A//MUSK//CST6//LCE2B//KRT17//UPK1A//NEUROG3//UPK2//ALPL//LCE2C//SERPINE1//DHCR24//RBP4//COL11A2//HOXC4//BMP10//MYLK//PODXL//POSTN
GO:0015695	organic cation transport	Biological process	4	33	187	14586	9.45455	0.000800384	0.794437	3.0967	ACACB//SLC44A4//SLC22A18//SLC22A14
GO:0051605	protein maturation by peptide bond cleavage	Biological process	5	58	187	14586	6.72414	0.000867763	0.794437	3.0616	SERPINE1//CORIN//SCG5//DHCR24//PCSK9
GO:0032501	multicellular organismal process	Biological process	87	5169	187	14586	1.31283	0.00109319	0.800654	2.9613	POSTN//COL11A2//ACAN//ALPL//CHAT//COLQ//PTPRJ//RBP4//TCF21//FGF19//PCSK9//SOX11//FOXJ1//SHROOM2//CORIN//LTB4R//MYLK//KIF4A//HNF4A//ATP2A3//SERPINE1//SERPINA1//CD177//PTK2//KIF9//SPN//CLEC7A//ADCY4//GRM2//HTR6//RASGRF1//PICK1//SYN3//DAZL//EMX1//GSX1//LHX6//BMP10//GNRH2//HOXB4//HOXC4//MUSK//NEUROG3//PAX4//HEMGN//SOX6//PLEKHB1//UPK2//SEMA5A//SUN5//DUSP13//NANOG//ARID1B//DPF1//TREM2//CACNA1G//NPAS1//…
GO:0048856	anatomical structure development	Biological process	57	3072	187	14586	1.44727	0.00148606	0.805799	2.82796	POSTN//COL11A2//ACAN//ALPL//PTPRJ//RBP4//TCF21//FGF19//PCSK9//SOX11//FOXJ1//DAG1//HOXB4//SHROOM2//DAZL//CST6//PAX4//DHCR24//TFAP2A//LHX6//NEUROG3//ARID1B//DPF1//SEMA5A//KIF4A//TREM2//PTK2//CACNA1G//NPAS1//EMX1//BMP10//IL15//MUSK//SOX6//LCE2B//KRT17//STMN2//KLK3//GSX1//BCL11A//RUNX1//RASGRP4//HSD11B1//RBP1//UPK1A//UPK2//HNF4A//RASGRF1//LCE2C//NANOG//SERPINE1//SPN//PICK1//TNS3//HOXC4//MYLK//PODXL
GO:0030324	lung development	Biological process	6	101	187	14586	4.63366	0.00189666	0.805799	2.72201	TNS3//TCF21//DAG1//FOXJ1//HSD11B1//RBP4
GO:0007172	signal complex assembly	Biological process	3	20	187	14586	11.7	0.00201301	0.805799	2.69615	MUSK//PICK1//PTK2
GO:0048731	system development	Biological process	52	2777	187	14586	1.46057	0.00212951	0.805799	2.67172	POSTN//COL11A2//ACAN//ALPL//PTPRJ//RBP4//FGF19//PCSK9//SOX11//TCF21//FOXJ1//SHROOM2//PAX4//LHX6//NEUROG3//ARID1B//DPF1//SEMA5A//KIF4A//TREM2//PTK2//CACNA1G//NPAS1//EMX1//BMP10//IL15//MUSK//SOX6//CST6//LCE2B//KRT17//STMN2//KLK3//TFAP2A//GSX1//BCL11A//RUNX1//RASGRP4//HSD11B1//DHCR24//RBP1//HNF4A//RASGRF1//LCE2C//SPN//PICK1//SERPINE1//TNS3//HOXB4//HOXC4//MYLK//DAG1
GO:0030323	respiratory tube development	Biological process	6	104	187	14586	4.5	0.00220044	0.805799	2.65749	FOXJ1//HSD11B1//RBP4//TNS3//TCF21//DAG1
GO:0045807	positive regulation of endocytosis	Biological process	4	48	187	14586	6.5	0.00327824	0.95393	2.48436	PCSK9//SERPINE1//CLEC7A//SNCA
GO:0016485	protein processing	Biological process	5	79	187	14586	4.93671	0.00343937	0.95393	2.46352	PCSK9//SERPINE1//CORIN//SCG5//DHCR24
GO:0006775	fat-soluble vitamin metabolic process	Biological process	4	49	187	14586	6.36735	0.00353442	0.95393	2.45168	RBP1//LGMN//RETSAT//RBP4
GO:0007275	multicellular organismal development	Biological process	59	3331	187	14586	1.38157	0.00364692	0.95393	2.43807	POSTN//COL11A2//ACAN//ALPL//PTPRJ//RBP4//TCF21//FGF19//PCSK9//SOX11//FOXJ1//SHROOM2//NANOG//PAX4//LHX6//NEUROG3//ARID1B//DPF1//SEMA5A//KIF4A//TREM2//PTK2//CACNA1G//NPAS1//EMX1//BMP10//IL15//MUSK//SOX6//CST6//LCE2B//KRT17//HOXB4//HOXC4//STMN2//KLK3//TFAP2A//GSX1//BCL11A//RUNX1//RASGRP4//HSD11B1//DHCR24//RBP1//HNF4A//RASGRF1//LCE2C//PICK1//SPN//SERPINE1//TNS3//MYLK//DAG1//PODXL//DAZL//GNRH2//HEMGN/…
GO:0048513	organ development	Biological process	37	1860	187	14586	1.55161	0.00407043	0.9842	2.39036	RBP4//FGF19//PCSK9//SOX11//TCF21//FOXJ1//SHROOM2//PAX4//EMX1//PTPRJ//BMP10//IL15//MUSK//SOX6//CST6//LCE2B//KRT17//LHX6//GSX1//BCL11A//RUNX1//RASGRP4//HSD11B1//TFAP2A//DHCR24//RBP1//HNF4A//NEUROG3//ALPL//LCE2C//SPN//TNS3//HOXB4//HOXC4//COL11A2//MYLK//DAG1
GO:0060541	respiratory system development	Biological process	6	119	187	14586	3.93277	0.00430017	0.9842	2.36651	FOXJ1//HSD11B1//RBP4//TNS3//TCF21//DAG1
GO:0042445	hormone metabolic process	Biological process	7	160	187	14586	3.4125	0.00457956	0.98649	2.33918	HSD11B1//CORIN//SCG5//LGMN//RETSAT//RBP1//RBP4
GO:0051604	protein maturation	Biological process	5	90	187	14586	4.33333	0.00599306	1	2.22235	PCSK9//SERPINE1//CORIN//SCG5//DHCR24
GO:0007218	neuropeptide signaling pathway	Biological process	5	91	187	14586	4.28571	0.00627707	1	2.20224	NXPH4//AGRP//BAI2//SCG5//GALP
GO:0006776	vitamin A metabolic process	Biological process	3	30	187	14586	7.8	0.00652691	1	2.18529	RETSAT//RBP1//RBP4
GO:0007186	G-protein coupled receptor protein signaling pathway	Biological process	15	570	187	14586	2.05263	0.00668998	1	2.17458	HTR6//ADCY4//LTB4R//PICK1//NXPH4//AGRP//BAI2//SCG5//GALP//RASGRP4//MGRN1//SNCA//OXGR1//GRM2//GPRC5C
GO:0001919	regulation of receptor recycling	Biological process	2	10	187	14586	15.6	0.0068758	1	2.16268	PCSK9//SNCA
GO:0030852	regulation of granulocyte differentiation	Biological process	2	11	187	14586	14.1818	0.00833327	1	2.07918	RUNX1//RBP1
GO:0051898	negative regulation of protein kinase B signaling cascade	Biological process	2	11	187	14586	14.1818	0.00833327	1	2.07918	DAG1//PTPRJ
GO:0006720	isoprenoid metabolic process	Biological process	4	64	187	14586	4.875	0.00913865	1	2.03912	DOLPP1//RBP1//RETSAT//RBP4
GO:0001881	receptor recycling	Biological process	2	12	187	14586	13	0.00991614	1	2.00366	PCSK9//SNCA
GO:0002011	morphogenesis of an epithelial sheet	Biological process	2	12	187	14586	13	0.00991614	1	2.00366	DAG1//HOXB4
GO:0008105	asymmetric protein localization	Biological process	2	12	187	14586	13	0.00991614	1	2.00366	SHROOM2//COLQ
GO:0031638	zymogen activation	Biological process	2	12	187	14586	13	0.00991614	1	2.00366	SERPINE1//DHCR24
GO:0043113	receptor clustering	Biological process	2	12	187	14586	13	0.00991614	1	2.00366	MUSK//PICK1
GO:0060343	trabecula formation	Biological process	2	12	187	14586	13	0.00991614	1	2.00366	BMP10//RBP4
GO:0061383	trabecula morphogenesis	Biological process	2	12	187	14586	13	0.00991614	1	2.00366	BMP10//RBP4
GO:0001523	retinoid metabolic process	Biological process	3	35	187	14586	6.68571	0.0100417	1	1.99819	RETSAT//RBP1//RBP4
GO:0016101	diterpenoid metabolic process	Biological process	3	35	187	14586	6.68571	0.0100417	1	1.99819	RETSAT//RBP1//RBP4
GO:0032862	activation of Rho GTPase activity	Biological process	2	13	187	14586	12	0.011621	1	1.93476	RASGRF1//FOXJ1
GO:0065008	regulation of biological quality	Biological process	40	2192	187	14586	1.42336	0.0119303	1	1.92335	CHAT//COLQ//RASGRP4//HPN//MUC12//CISH//CORIN//KIF4A//HNF4A//ATP2A3//SERPINE1//SERPINA1//CD177//PTK2//KIF9//SPN//KDELR3//HSD11B1//CLDN16//FTMT//HEPH//DAG1//CXCR3//SYN3//KCNC2//MUSK//CPLX2//SCG5//RBP4//PRSS2//BMP10//PTPRJ//SHROOM2//LGMN//RETSAT//RBP1//PCSK9//SP1//SNCA
GO:0032502	developmental process	Biological process	61	3661	187	14586	1.29964	0.0121653	1	1.91488	SERPINE1//POSTN//COL11A2//ACAN//ALPL//PTPRJ//RBP4//TCF21//FGF19//PCSK9//SOX11//FOXJ1//DAG1//HOXB4//SHROOM2//DAZL//EMX1//GSX1//LHX6//BMP10//GNRH2//HOXC4//MUSK//NEUROG3//PAX4//HEMGN//SOX6//PLEKHB1//UPK2//SEMA5A//CST6//NANOG//DHCR24//TFAP2A//ARID1B//DPF1//KIF4A//TREM2//PTK2//CACNA1G//NPAS1//IL15//LCE2B//KRT17//STMN2//KLK3//BCL11A//RUNX1//RASGRP4//CTBP2//HSD11B1//RBP1//UPK1A//HNF4A//RASGRF1//LCE2C//P…
GO:0043112	receptor metabolic process	Biological process	4	71	187	14586	4.39437	0.0130453	1	1.88455	PCSK9//SNCA//MUSK//PICK1
GO:0055021	regulation of cardiac muscle tissue growth	Biological process	2	14	187	14586	11.1429	0.0134444	1	1.87146	RBP4//BMP10
GO:0055024	regulation of cardiac muscle tissue development	Biological process	2	14	187	14586	11.1429	0.0134444	1	1.87146	RBP4//BMP10
GO:0060043	regulation of cardiac muscle cell proliferation	Biological process	2	14	187	14586	11.1429	0.0134444	1	1.87146	RBP4//BMP10
GO:0001505	regulation of neurotransmitter levels	Biological process	5	110	187	14586	3.54545	0.0136151	1	1.86598	CHAT//COLQ//SYN3//CPLX2//SNCA
GO:0060429	epithelium development	Biological process	11	400	187	14586	2.145	0.014209	1	1.84744	TCF21//FOXJ1//DAG1//HOXB4//TFAP2A//UPK1A//NEUROG3//UPK2//LCE2B//LCE2C//PODXL
GO:0051128	regulation of cellular component organization	Biological process	17	742	187	14586	1.78706	0.0147551	1	1.83106	MUC12//CISH//PCSK9//STMN2//NEK2//UBE2C//MUSK//PRSS2//BMP10//HNF4A//PTPRJ//SHROOM2//SNCA//PODXL//DLGAP5//SERPINE1//CLEC7A
GO:0030851	granulocyte differentiation	Biological process	2	15	187	14586	10.4	0.0153833	1	1.81295	RBP1//RUNX1
GO:0000070	mitotic sister chromatid segregation	Biological process	3	41	187	14586	5.70732	0.0154668	1	1.8106	DLGAP5//KIF25//NEK2
GO:0045785	positive regulation of cell adhesion	Biological process	4	77	187	14586	4.05195	0.0171309	1	1.76622	HSD17B12//PODXL//PTPRJ//PRSS2
GO:0030855	epithelial cell differentiation	Biological process	7	207	187	14586	2.63768	0.0174265	1	1.75879	LCE2B//LCE2C//UPK1A//FOXJ1//NEUROG3//TCF21//UPK2
GO:0060420	regulation of heart growth	Biological process	2	16	187	14586	9.75	0.0174342	1	1.7586	RBP4//BMP10
GO:0009617	response to bacterium	Biological process	8	256	187	14586	2.4375	0.0175256	1	1.75633	DEFA3//DEFB121//DEFB128//SPN//SERPINE1//ALPL//SERPINA1//SNCA
GO:0006721	terpenoid metabolic process	Biological process	3	43	187	14586	5.44186	0.0175764	1	1.75507	RETSAT//RBP1//RBP4
GO:0030336	negative regulation of cell migration	Biological process	4	78	187	14586	4	0.017881	1	1.74761	BMP10//SERPINE1//DAG1//PTPRJ
GO:2000146	negative regulation of cell motility	Biological process	4	78	187	14586	4	0.017881	1	1.74761	BMP10//SERPINE1//DAG1//PTPRJ
GO:0000819	sister chromatid segregation	Biological process	3	44	187	14586	5.31818	0.0186884	1	1.72843	KIF25//NEK2//DLGAP5
GO:0030155	regulation of cell adhesion	Biological process	6	164	187	14586	2.85366	0.0191146	1	1.71863	SPN//HSD17B12//PODXL//SERPINE1//PRSS2//PTPRJ
GO:0007155	cell adhesion	Biological process	18	826	187	14586	1.69976	0.0194305	1	1.71152	CDH18//SPN//HSD17B12//CLEC7A//CLDN16//CLDN19//DAG1//PODXL//PTPRJ//SERPINE1//PRSS2//SIGLEC14//EFS//POSTN//COL11A2//ACAN//CXCR3//SEMA5A
GO:0022610	biological adhesion	Biological process	18	826	187	14586	1.69976	0.0194305	1	1.71152	SIGLEC14//CDH18//EFS//POSTN//COL11A2//ACAN//CXCR3//SEMA5A//SPN//HSD17B12//CLEC7A//CLDN16//CLDN19//DAG1//PODXL//PTPRJ//SERPINE1//PRSS2
GO:0030100	regulation of endocytosis	Biological process	4	80	187	14586	3.9	0.0194417	1	1.71127	PCSK9//SNCA//SERPINE1//CLEC7A
GO:0031113	regulation of microtubule polymerization	Biological process	2	17	187	14586	9.17647	0.019594	1	1.70788	STMN2//SNCA
GO:0032856	activation of Ras GTPase activity	Biological process	2	17	187	14586	9.17647	0.019594	1	1.70788	FOXJ1//RASGRF1
GO:0033628	regulation of cell adhesion mediated by integrin	Biological process	2	17	187	14586	9.17647	0.019594	1	1.70788	SERPINE1//PODXL
GO:0048260	positive regulation of receptor-mediated endocytosis	Biological process	2	18	187	14586	8.66667	0.0218598	1	1.66035	PCSK9//SERPINE1
GO:0034754	cellular hormone metabolic process	Biological process	4	83	187	14586	3.75904	0.0219364	1	1.65883	HSD11B1//RETSAT//RBP1//RBP4
GO:0003001	generation of a signal involved in cell-cell signaling	Biological process	8	268	187	14586	2.32836	0.0223637	1	1.65046	CHAT//SYN3//KCNC2//GRM2//SNCA//CPLX2//RBP4//SCG5
GO:0023061	signal release	Biological process	8	268	187	14586	2.32836	0.0223637	1	1.65046	CHAT//SYN3//KCNC2//GRM2//SNCA//CPLX2//RBP4//SCG5
GO:0042742	defense response to bacterium	Biological process	5	125	187	14586	3.12	0.0224148	1	1.64947	SERPINE1//DEFA3//DEFB121//DEFB128//SPN
GO:0006898	receptor-mediated endocytosis	Biological process	4	84	187	14586	3.71429	0.0228094	1	1.64189	PCSK9//SNCA//SERPINE1//FOLR1
GO:0051271	negative regulation of cellular component movement	Biological process	4	84	187	14586	3.71429	0.0228094	1	1.64189	BMP10//SERPINE1//DAG1//PTPRJ
GO:0045058	T cell selection	Biological process	2	19	187	14586	8.21053	0.0242283	1	1.61568	SPN//IL15
GO:0051707	response to other organism	Biological process	11	434	187	14586	1.97696	0.0243306	1	1.61385	SPN//CLEC7A//DEFA3//DEFB121//DEFB128//LILRB1//SERPINE1//ALPL//SERPINA1//SNCA//IL15
GO:0015697	quaternary ammonium group transport	Biological process	2	20	187	14586	7.8	0.0266966	1	1.57354	ACACB//SLC44A4
GO:0045744	negative regulation of G-protein coupled receptor protein signaling pathway	Biological process	2	20	187	14586	7.8	0.0266966	1	1.57354	SNCA//MGRN1
GO:0048536	spleen development	Biological process	2	20	187	14586	7.8	0.0266966	1	1.57354	HOXB4//TCF21
GO:0055017	cardiac muscle tissue growth	Biological process	2	20	187	14586	7.8	0.0266966	1	1.57354	BMP10//RBP4
GO:0060038	cardiac muscle cell proliferation	Biological process	2	20	187	14586	7.8	0.0266966	1	1.57354	RBP4//BMP10
GO:0035295	tube development	Biological process	8	282	187	14586	2.21277	0.0291211	1	1.53579	TCF21//FOXJ1//TFAP2A//HSD11B1//RBP4//TNS3//DAG1//PODXL
GO:0014855	striated muscle cell proliferation	Biological process	2	21	187	14586	7.42857	0.0292619	1	1.5337	BMP10//RBP4
GO:0046785	microtubule polymerization	Biological process	2	21	187	14586	7.42857	0.0292619	1	1.5337	STMN2//SNCA
GO:0040013	negative regulation of locomotion	Biological process	4	92	187	14586	3.3913	0.030554	1	1.51493	BMP10//SERPINE1//DAG1//PTPRJ
GO:0010466	negative regulation of peptidase activity	Biological process	4	93	187	14586	3.35484	0.0316183	1	1.50006	SERPINE1//SERPINA1//DHCR24//SNCA
GO:0007162	negative regulation of cell adhesion	Biological process	3	54	187	14586	4.33333	0.0319113	1	1.49606	PODXL//SERPINE1//SPN
GO:0016486	peptide hormone processing	Biological process	2	22	187	14586	7.09091	0.0319212	1	1.49592	CORIN//SCG5
GO:0030574	collagen catabolic process	Biological process	2	22	187	14586	7.09091	0.0319212	1	1.49592	ADAMTS14//PRSS2
GO:0051180	vitamin transport	Biological process	2	22	187	14586	7.09091	0.0319212	1	1.49592	FOLR1//RBP4
GO:0007267	cell-cell signaling	Biological process	18	875	187	14586	1.60457	0.0321171	1	1.49326	CHAT//COLQ//ADCY4//GRM2//HTR6//RASGRF1//PICK1//SYN3//KCNC2//MUSK//SNCA//CPLX2//RBP4//SCG5//EFNA4//IL15//SEMA5A//DLGAP5
GO:0030154	cell differentiation	Biological process	36	2068	187	14586	1.35783	0.0327249	1	1.48512	PTPRJ//FGF19//DAZL//RBP4//KIF4A//TREM2//PTK2//CACNA1G//SEMA5A//MUSK//STMN2//SOX11//GSX1//LHX6//PCSK9//RASGRP4//RUNX1//EMX1//BCL11A//RBP1//UPK1A//FOXJ1//NEUROG3//TCF21//UPK2//RASGRF1//LCE2B//LCE2C//IL15//NANOG//SPN//PICK1//BMP10//PAX4//HEMGN//CTBP2
GO:0015850	organic alcohol transport	Biological process	3	55	187	14586	4.25455	0.033443	1	1.47569	SNCA//SLC44A4//SLC22A18
GO:0016202	regulation of striated muscle tissue development	Biological process	3	55	187	14586	4.25455	0.033443	1	1.47569	MUSK//RBP4//BMP10
GO:0016338	calcium-independent cell-cell adhesion	Biological process	2	23	187	14586	6.78261	0.0346718	1	1.46002	CLDN16//CLDN19
GO:0033627	cell adhesion mediated by integrin	Biological process	2	23	187	14586	6.78261	0.0346718	1	1.46002	SERPINE1//PODXL
GO:0048008	platelet-derived growth factor receptor signaling pathway	Biological process	2	23	187	14586	6.78261	0.0346718	1	1.46002	PTPRJ//SNCA
GO:0060419	heart growth	Biological process	2	23	187	14586	6.78261	0.0346718	1	1.46002	BMP10//RBP4
GO:0048634	regulation of muscle organ development	Biological process	3	57	187	14586	4.10526	0.0366193	1	1.43629	MUSK//RBP4//BMP10
GO:0048534	hemopoietic or lymphoid organ development	Biological process	9	351	187	14586	2	0.0372796	1	1.42853	IL15//BCL11A//RUNX1//RASGRP4//RBP1//FOXJ1//SPN//HOXB4//TCF21
GO:0031111	negative regulation of microtubule polymerization or depolymerization	Biological process	2	24	187	14586	6.5	0.0375109	1	1.42584	STMN2//SNCA
GO:0032321	positive regulation of Rho GTPase activity	Biological process	2	24	187	14586	6.5	0.0375109	1	1.42584	FOXJ1//RASGRF1
GO:0016049	cell growth	Biological process	8	298	187	14586	2.09396	0.0384363	1	1.41526	MUC12//CISH//PRSS2//BMP10//HNF4A//PTPRJ//RASGRP4//HPN
GO:0009607	response to biotic stimulus	Biological process	12	526	187	14586	1.77947	0.0385889	1	1.41354	SPN//CLEC7A//DEFA3//DEFB121//DEFB128//LILRB1//SERPINE1//ALPL//SERPINA1//SNCA//IL15//LOC402778
GO:0042130	negative regulation of T cell proliferation	Biological process	2	25	187	14586	6.24	0.0404358	1	1.39323	FOXJ1//SPN
GO:0042133	neurotransmitter metabolic process	Biological process	2	25	187	14586	6.24	0.0404358	1	1.39323	CHAT//COLQ
GO:0010810	regulation of cell-substrate adhesion	Biological process	3	60	187	14586	3.9	0.0416634	1	1.38025	HSD17B12//PTPRJ//SERPINE1
GO:0007017	microtubule-based process	Biological process	8	303	187	14586	2.05941	0.0417154	1	1.3797	KIF4A//KIF25//KIF9//STMN2//UBE2C//SNCA//DAG1//NEK2
GO:0048729	tissue morphogenesis	Biological process	8	304	187	14586	2.05263	0.0423929	1	1.37271	TCF21//FOXJ1//DAG1//HOXB4//TFAP2A//BMP10//MYLK//PODXL
GO:0019226	transmission of nerve impulse	Biological process	12	534	187	14586	1.75281	0.0424734	1	1.37188	CHAT//COLQ//ADCY4//GRM2//HTR6//RASGRF1//PICK1//SYN3//MUSK//CPLX2//CLDN19//SNCA
GO:0035637	multicellular organismal signaling	Biological process	12	534	187	14586	1.75281	0.0424734	1	1.37188	CHAT//COLQ//ADCY4//GRM2//HTR6//RASGRF1//PICK1//SYN3//MUSK//CPLX2//CLDN19//SNCA
GO:0001501	skeletal system development	Biological process	8	305	187	14586	2.0459	0.0430777	1	1.36575	HOXB4//TFAP2A//RBP4//COL11A2//HOXC4//POSTN//ACAN//ALPL
GO:0043154	negative regulation of caspase activity	Biological process	2	26	187	14586	6	0.0434438	1	1.36207	DHCR24//SNCA
GO:0007268	synaptic transmission	Biological process	11	477	187	14586	1.79874	0.0436392	1	1.36012	CHAT//COLQ//SYN3//MUSK//CPLX2//SNCA//ADCY4//GRM2//HTR6//RASGRF1//PICK1
GO:0048869	cellular developmental process	Biological process	36	2119	187	14586	1.32515	0.0446771	1	1.34991	PTPRJ//FGF19//DAZL//RBP4//KIF4A//TREM2//PTK2//CACNA1G//SEMA5A//MUSK//STMN2//SOX11//GSX1//LHX6//PCSK9//RASGRP4//RUNX1//CTBP2//HEMGN//NANOG//EMX1//BCL11A//RBP1//UPK1A//FOXJ1//NEUROG3//TCF21//UPK2//RASGRF1//LCE2B//LCE2C//IL15//SPN//PICK1//BMP10//PAX4
GO:0030217	T cell differentiation	Biological process	4	104	187	14586	3	0.0447574	1	1.34914	FOXJ1//SPN//IL15//BCL11A
GO:0008277	regulation of G-protein coupled receptor protein signaling pathway	Biological process	3	62	187	14586	3.77419	0.0452102	1	1.34476	MGRN1//SNCA//RASGRP4
GO:0046677	response to antibiotic	Biological process	2	27	187	14586	5.77778	0.0465324	1	1.33224	ALPL//SLC22A18
GO:0048259	regulation of receptor-mediated endocytosis	Biological process	2	27	187	14586	5.77778	0.0465324	1	1.33224	PCSK9//SERPINE1
GO:0048286	lung alveolus development	Biological process	2	27	187	14586	5.77778	0.0465324	1	1.33224	TNS3//TCF21
GO:0060425	lung morphogenesis	Biological process	2	27	187	14586	5.77778	0.0465324	1	1.33224	DAG1//TCF21
GO:0008361	regulation of cell size	Biological process	8	313	187	14586	1.99361	0.0488205	1	1.3114	RASGRP4//HPN//MUC12//CISH//PRSS2//BMP10//HNF4A//PTPRJ
GO:0009620	response to fungus	Biological process	2	28	187	14586	5.57143	0.049699	1	1.30365	CLEC7A//DEFA3
GO:0031623	receptor internalization	Biological process	2	28	187	14586	5.57143	0.049699	1	1.30365	PCSK9//SNCA
GO:0044243	multicellular organismal catabolic process	Biological process	2	28	187	14586	5.57143	0.049699	1	1.30365	ADAMTS14//PRSS2
